## Collateral sensitivity is contingent on the repeatability of evolution

Daniel Nichol<sup>1,2\*</sup>, Joseph Rutter<sup>3</sup>, Christopher Bryant<sup>4</sup>, Andrea M Hujer<sup>3, 4</sup>, Peter Jeavons<sup>1</sup>, Alexander RA Anderson<sup>5</sup>, Robert A Bonomo<sup>3,4,6,7</sup>, Jacob G Scott<sup>7,8,9\*</sup>

**1 Department of Computer Science, University of Oxford, Oxford, UK**

**2 Centre for Evolution and Cancer, The Institute of Cancer Research, London, UK**

**3 Research Service, Louis Stokes Department of Veterans Affairs Hospital, Cleveland, OH, USA**

**4 Department of Medicine, Case Western Reserve University School of Medicine, Cleveland, OH, USA**

**5 Department of Integrated Mathematical Oncology, H. Lee Moffitt Cancer Center and Research Institute, Tampa, FL, USA**

**6 Departments of Biochemistry, Molecular Biology and Microbiology, and Pharmacology, Case Western Reserve University School of Medicine, Cleveland, OH, USA**

**7 Center for Proteomics and Bioinformatics, Case Western Reserve University School of Medicine, Cleveland, OH, USA**

**8 Wolfson Centre for Mathematical Biology, Mathematical Institute, University of Oxford, Oxford, UK**

**9 Departments of Translational Hematology and Oncology Research and Radiation Oncology, Cleveland Clinic, Cleveland, OH, USA**

\* [daniel.nichol@icr.ac.uk](mailto:daniel.nichol@icr.ac.uk) (DN); [scottj10@ccf.org](mailto:scottj10@ccf.org) (JGS)

1        Antibiotic resistance represents a growing health crisis that necessitates the im-  
2        mediate discovery of novel treatment strategies. One such strategy is the identifica-  
3        tion of sequences of drugs exhibiting *collateral sensitivity*, wherein the evolution of  
4        resistance to a first drug renders a population more susceptible to a second. Here,  
5        we demonstrate that sequential multi-drug therapies derived from *in vitro* evolution  
6        experiments can, in some cases, have overstated therapeutic benefit – potentially  
7        suggesting a collaterally sensitive response where cross resistance ultimately occurs.  
8        The evolution of drug resistance need not be genetically or phenotypically conver-  
9        gent, and where resistance arises through divergent mechanisms, the efficacy of a  
10       second drug can vary substantially. We first quantify the likelihood of this occur-  
11       ring by use of a mathematical model parametrised by a set of small combinatorially  
12       complete fitness landscapes for *Escherichia coli*. We then verify, through *in vitro*  
13       experimental evolution, that a second-line drug can indeed stochastically exhibit ei-  
14       ther increased susceptibility or increased resistance when following a first. Genetic  
15       divergence is confirmed as the driver of this differential response through targeted  
16       sequencing. These results indicate that the present methodology of designing drug  
17       regimens through experimental collateral sensitivity analysis may be flawed under  
18       certain ecological conditions. Further, these results suggest the need for a more  
19       rigorous probabilistic understanding of the contingencies that can arise during the  
20       evolution of drug resistance.

21       The emergence of drug resistance is governed by Darwinian dynamics, wherein resistant  
22       mutants arise stochastically in a population and expand under the selective pressure of therapy [22].  
23       These evolutionary principles underpin resistance to the presently most effective therapies for  
24       bacterial infections [4], cancers [8], viral infections [2] and disparate problems such as the  
25       management of invasive species and agricultural pests [14]. Biological mechanisms of drug  
26       resistance often carry a fitness cost in the absence of the drug and further, different resistance  
27       mechanisms can interact with one another to produce non-additive fitness effects, a phenomenon  
28       known as epistasis [19]. These trade-offs can induce rugged fitness landscapes, potentially  
29       restricting the number of accessible evolutionary trajectories to high fitness [20, 24] or rendering  
30       evolution irreversible [23].

31       Identifying evolutionary trade-offs forms the basis of an emerging strategy for combating drug  
32       resistance; prescribing sequences of drugs wherein the evolution of resistance to the first induces  
33       susceptibility to the next [10, 12, 17]. Where this occurs, the first drug is said to induce *collateral*  
34       *sensitivity* in the second. Conversely, where the first drug induces increased resistance in the  
35       second, *collateral* (or *cross*) *resistance* has occurred. Recently, *in vitro* evolution experiments  
36       have been performed, in both bacteria [5, 10, 16] and cancers [7, 28], to identify drug pairs or

37 sequences exhibiting collateral sensitivity. These experiments proceed by culturing a population  
38 in increasing concentrations of a drug to induce resistance and then assaying the susceptibility of  
39 the resultant population to a panel of potential second-line therapies. From these experiments,  
40 sequences or cycles of drugs in which each induces collateral sensitivity in the next have been  
41 suggested as potential therapeutic strategies to extend the therapeutic efficacy of a limited pool  
42 of drugs [7, 10]. For some cancer therapies, which often have severe side-effects and high toxicity,  
43 such sequential therapies may be the only way combine the use of multiple drugs.

44 We argue that collaterally sensitive drug pairs identified from a small number of *in vitro*  
45 evolutionary replicates likely do not *always* induce collateral sensitivity. This hypothesis arises  
46 from the observation that evolution is not necessarily repeatable; resistance to a drug can arise  
47 through multiple different mechanisms, as has been observed in cancers [27] and bacteria [1]. An  
48 *a priori* reason to assume that these different mechanisms will have correlated fitness effects  
49 under a second drug is not evident – just like the grade school lesson of convergent evolution:  
50 bats and birds can both fly, but their predators often differ. Indeed, one mutation may confer  
51 resistance to a second drug, whilst another may induce increased susceptibility (in comparison  
52 to the susceptibility of the wild-type), as was recently demonstrated in a drug screen of over  
53 3000 strains of *Staphylococcus aureus* [11]. The potential impact of such divergent evolution  
54 can be conceptualised in the classical fitness landscape model of Wright [25], wherein genotypes  
55 are projected onto the two dimensional  $x - y$  plane and fitness represented as the height above  
56 this plane. Evolution can be viewed as a stochastic ‘up-hill’ walk in this landscape wherein  
57 divergence can occur at a saddle. Figure 1 shows such a schematic fitness landscape annotated to  
58 demonstrate the capacity for divergent evolution and the potential effects on collateral sensitivity.

59 Previous studies have attempted to empirically determine the structure of the fitness landscape  
60 for a number of organisms and under different drugs [6]. In these studies, a small number of  
61 mutations associated with resistance are first identified. Strains are engineered corresponding  
62 to all possible combinations of presence and absence of these mutations and the fitness of each  
63 strain is measured by a proxy value, for example minimum inhibitory concentration (MIC) of a  
64 drug or average growth rate under a specific dose. These measurements are combined with the  
65 known genotypes to form a fitness landscape. However, to derive fitness landscapes through this  
66 method, the number of strains that must be engineered grows exponentially with the number of  
67 mutations of interest. Thus only small, combinatorially complete, portions of the true fitness  
68 landscape can be measured, for example consisting of 2-5 alleles [6, 18, 24]. Nevertheless, these  
69 restricted fitness landscapes can provide valuable insight into the evolution of drug resistance.

70 Mira et al. [15] derived fitness landscapes for *E. coli* with all combinations of four fitness  
71 conferring mutations (M69L, E104K, G238S and N276D) in the TEM gene and measured fitness  
72 under 15 different  $\beta$ -lactam antibiotics (See Supplementary Table 1), using the average growth

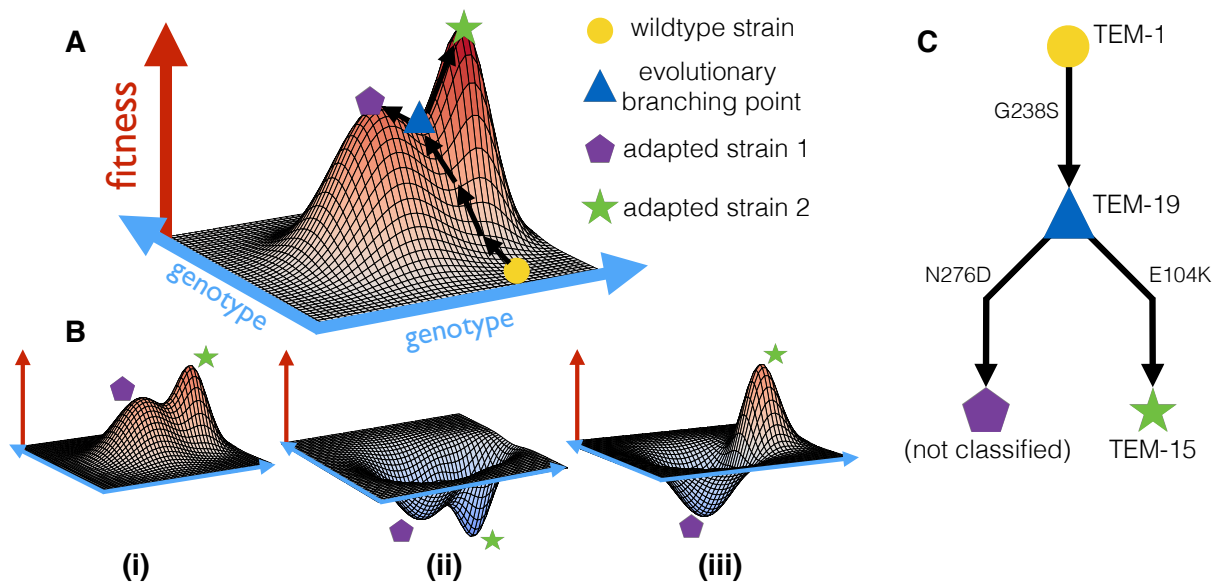

**Figure 1. Evolutionary saddle points can drive divergent collateral response.** **A**) A schematic fitness landscape model in which divergent evolution can occur. Following Wright [25], the  $x - y$  plane represents the genotypes and the height of the landscape above this plane represents fitness. Two evolutionary trajectories, both starting from a wild-type genotype (yellow circle), are shown. These trajectories diverge at an evolutionary saddle point (blue triangle) and terminate at distinct local optima of fitness (purple pentagon, green star). As the saddle point exists, evolutionary trajectories need not be repeatable. **B**) Schematic landscapes for a potential follow-up drug are shown, the collateral response can be (i) always cross-resistant, (ii) always collaterally sensitive or (iii) dependent on the evolutionary trajectory that occurs stochastically under the first drug. **C**) A potential evolutionary branching point in the TEM gene of *E. coli* identified in the fitness landscape for cefotaxime derived by Mira et al. [15].

73 rate (over 12 replicates) as a proxy of fitness. Of these 15 landscapes, 14 were identified as  
74 having multiple local optima of fitness, indicating the potential for the divergence of evolutionary  
75 trajectories. We utilised these landscapes, coupled with a previously published mathematical  
76 model [17] (see Methods), to estimate the likelihood of the different evolutionary trajectories  
77 from a wild-type genotype (denoted 0000) to each of the fitness optima. Using this model,  
78 we performed *in silico* assays for collateral sensitivity, mirroring the approach taken Imamovic  
79 and Sommer [10] (Figure 2). For each drug, we first stochastically simulated an evolutionary  
80 trajectory from the wild-type genotype to a local fitness optimum genotype and then, for all  
81 other landscapes, compared the fitness of this local optimum genotype to that of the wild-type.  
82 A schematic of this simulation is shown in Figure 2(A). Figure 2(B) shows an example of two  
83 evolutionary trajectories, which are modelled as sequences of randomly arising fitness conferring  
84 substitutions achieving fixation, that can arise stochastically in the fitness landscape for ampicillin,



85 as derived by Mira et al. [15].

86 We exhaustively enumerated all tables of collateral response that can arise under this model  
87 (See Supplementary Figures 1-9 for further details). Figure 2(C) shows the best case (most  
88 susceptible following evolution), worst case (highest resistance following evolution) and mostly  
89 likely collateral response tables that arose in this analysis, along with the mean collateral response  
90 table (expectation of collateral response for each pair). In these tables, columns indicate the the  
91 drug landscape under which the evolutionary simulation was performed and rows indicate the  
92 follow-up drug for which fold-change from wild-type susceptibility was measured. This analysis  
93 shows the remarkable variation in collateral response that can arise from divergent evolution  
94 under a first drug. Indeed, we find a total of 82,944 unique tables can arise, of which the most  
95 likely occurs with probability 0.0023. Amongst the 225 ordered drug pairs, only 28 show a  
96 guaranteed pattern of collateral sensitivity, whilst a further 94 show a pattern of guaranteed cross  
97 resistance. For 88 pairs, the first drug can induce either collateral sensitivity or cross resistance  
98 in the second as a result of divergent evolution under the first drug. Critically, if a collateral  
99 response table is generated by stochastic *in silico* simulation of the methodology of Imamovic  
100 and Sommer [10], and a collaterally sensitive drug pair chosen at random from this table, then  
101 the expected probability that first of these two drugs will induce cross resistance in the second is  
102 0.513 (determined from  $10^6$  simulations of this process).

103 The mathematical model used to derive these results represents a simplification of biological  
104 reality, owing to the assumptions of a monomorphic population and a parametrisation using only  
105 small fitness landscapes. To experimentally validate our predictions, we verified the existence of  
106 divergent collateral response through experimental evolution. Mirroring previous experimental  
107 approaches [5, 7, 10, 16, 28], we performed *in vitro* evolution of *E. coli* in the presence of the  
108  $\beta$ -lactam antibiotic cefotaxime. The bacterial populations were grown using the gradient plate  
109 method with concentrations of cefotaxime varying between  $0.06\mu\text{g/ml}$  and  $256\mu\text{g/m}$  over a course  
110 of 10 passages lasting 24 hours (See Figure 3(A) and Methods for details). For each replicate, and  
111 after every second passage, aliquots were taken such that the minimum inhibitory concentration  
112 (MIC) for a panel of second line drugs could be determined. A time-series for the MIC of the  
113 12 replicates under cefotaxime is shown over the 10 passages in Figure 3,(B) indicating that  
114 each replicate exhibited increased drug resistance after the 10th passage, although with varying  
115 magnitude and trajectory.

116 For each of a panel of 40 second-line antibiotics, the MIC for the strains X1-X4 was determined  
117 following passage 10, in addition to the MIC for the wild-type strain (Supplementary Table  
118 2). From these MIC values, a smaller panel of second-line antibiotics appearing to exhibit  
119 divergent collateral response was identified and the MIC of these drugs derived for each of the  
120 12 evolutionary replicates. Figure 3(C) shows the table of collateral response for this restricted

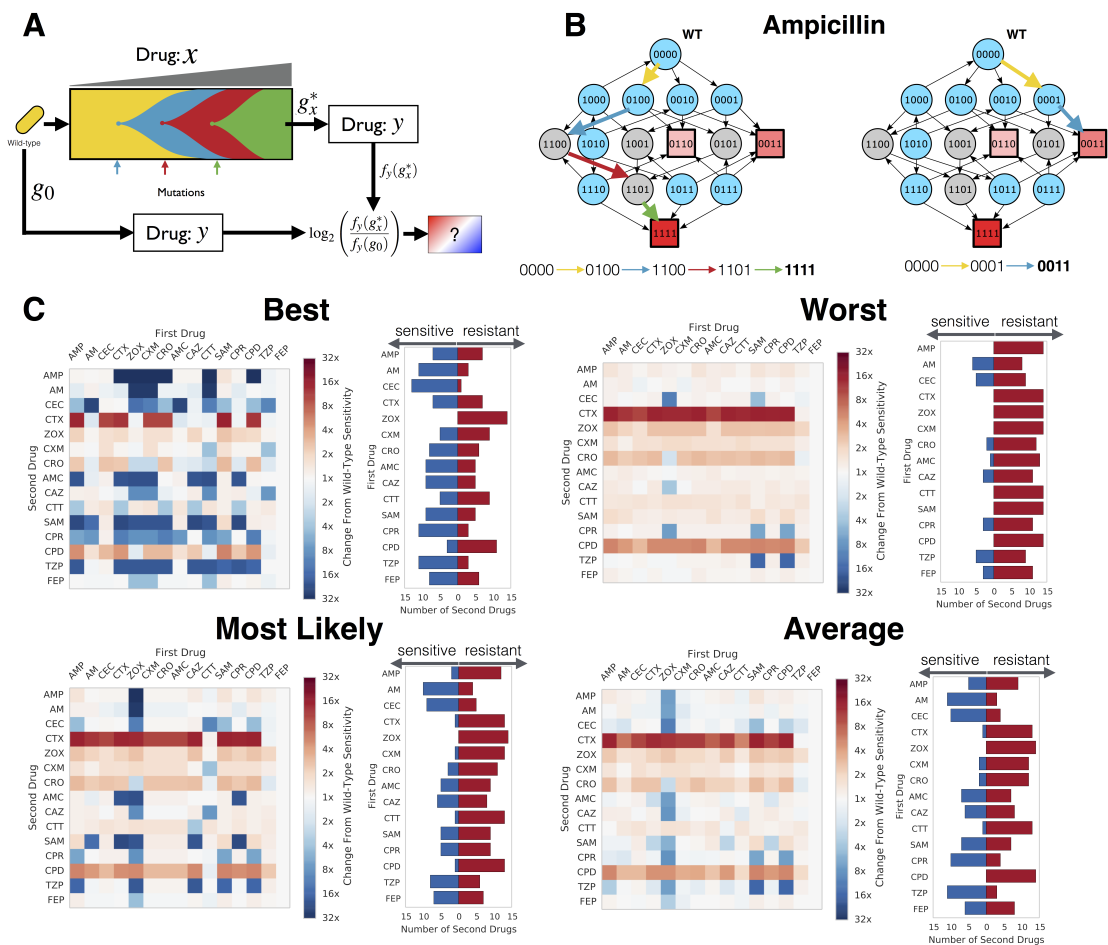

**Figure 2. Mathematical modeling predicts highly variable collateral response. A)** A schematic of the model used to derive collateral response. Sequential mutations are simulated to fix in the population until a local optimum genotype arises. The fitness of this resultant genotype is compared to the fitness of the wild-type genotype for each of the panel of antibiotics. **B)** The landscape for ampicillin derived by Mira et al. [15] represented as a graph of genotypes. Arrows indicate fitness conferring mutations between genotypes represented as nodes. Cyan nodes indicate genotypes from which evolution can stochastically diverge, grey nodes indicate genotypes from which there is only a single fitness conferring mutation. Squares indicate local optima of fitness with colour indicating the ordering of fitness amongst these optima (darker red indicates higher fitness). Two divergent evolutionary trajectories, in the sense of the model shown schematically in **A**, are highlighted by coloured arrows. **C)** The best, worst, most likely and mean tables of collateral response derived through stochastic simulation of the experimental protocol. Columns indicate the drug landscape under which the simulation was performed and rows indicate the follow-up drug under which the fold-change from wild-type susceptibility is calculated. Bar charts indicate, for each labelled first drug, the number of follow-up drugs exhibiting collateral sensitivity (blue) or cross resistance (red) in each case.

121 panel following the final passage in the experiment. As predicted, we identify divergent collateral  
122 response for the commonly prescribed antibiotics piperacillin (PIP), ticarcillin/clavulanate (TCC)  
123 and ampicillin/sulbactam (AMS). The patterns of collateral response exhibited between these  
124 drugs are not identical, for example, replicate X1 exhibits increased resistance to all three drugs,  
125 the replicate X2 exhibits increased susceptibility to all three drugs and the replicate X12 exhibits  
126 increased susceptibility to PIP and AMS but increased resistance to TCC.

127 Differential patterns of drug resistance could be driven by the different strains having  
128 experienced different numbers of sequential mutations along a single trajectory wherein each  
129 induces a shift in response (temporal collateral sensitivity [28]), by evolutionary divergence at  
130 a branching point in the landscape or by non-genetic mechanisms of resistance. To elucidate  
131 underlying mechanisms, we performed targeted sequencing of the SHV gene for each of the 10  
132 passage time points and the 12 evolutionary replicates (Figure 3(B)). We identified five variants  
133 of SHV-1 amongst the 12 replicates. X1, X5, X7-X9 and X11 all possess wild-type SHV-1, X2  
134 possesses the substitution G242S, X3 possesses G238C, X4 and X6 both possess G238A, and  
135 X10 and X12 both possess G238S. Our analysis revealed no evidence of double substitutions in  
136 SHV, although mutations to genes other than SHV could not be excluded. Such a mutation might  
137 explain the different susceptibility of replicates X10 and X12 (both of which harbour G238S) to  
138 PIP and AMS. This analysis identifies a minimum of four fitness conferring substitutions that  
139 can occur in SHV during exposure to cefotaxime, indicating the existence of a multi-dimensional  
140 evolutionary branching point in the fitness landscape. Further, the sensitivity of the population  
141 to a second drug is dependent on which of these substitutions occurs (Figure 3(C)). For example,  
142 G238C (replicate X3) induces increased susceptibility to TCC whilst G238A (replicates X4 and  
143 X6) induces a slight increase in resistance.

144 To conclude, we have shown the existence of an evolutionary branching point in the fitness  
145 landscape of cefotaxime that can induce divergent evolution and differential collateral response to  
146 second-line antibiotics. Furthermore, through a mathematical model of evolution parametrised by  
147 small, combinatorially complete fitness landscapes, we have highlighted the extent and importance  
148 of this phenomenon of evolutionary divergence. Specifically, modelling highlights that divergent  
149 collateral response is likely common (occurring in 14/15 drugs for which empirical landscapes  
150 were derived) and further, that even where collateral sensitivity is reported from a small number  
151 of evolutionary replicates, cross-resistance can still occur with high likelihood.

152 Taken together, our results highlight the potential advantage of reporting tables of collateral  
153 response derived from evolutionary experiments with many replicates. In the worst case scenario,  
154 where too few replicates of evolutionary replicates are performed, the reported tables of collateral  
155 response may indicate an effective, collaterally sensitive, drug pair where the first can induce  
156 substantial cross-resistance to the second. Rather than give up entirely on the concept of

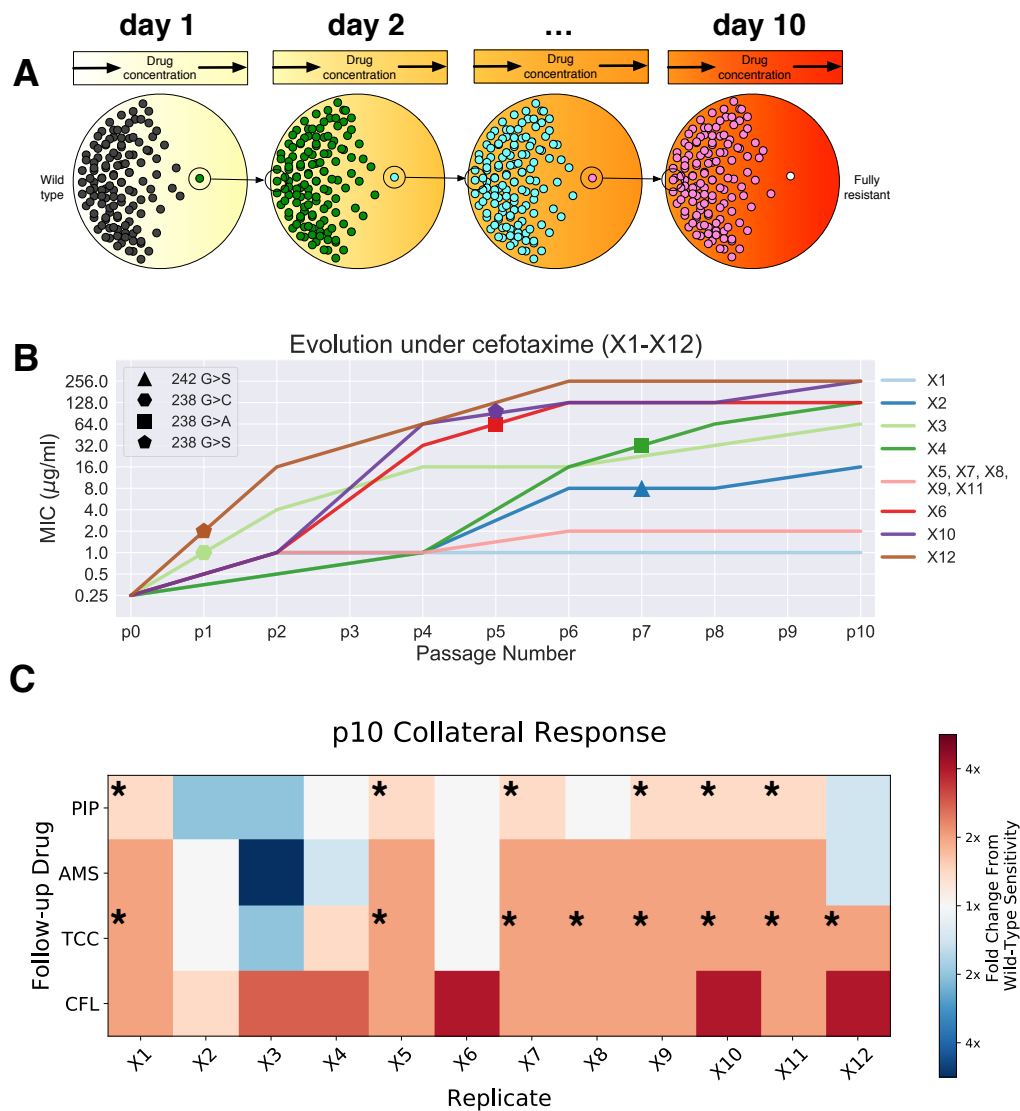

**Figure 3. Experimental evolution reveals divergent collateral response.** **A)** A schematic of the evolutionary experiment. *E. coli* were grown using the gradient plate method and passaged every 24 hours for a total of 10 passages. Twelve replicates of experimental evolution were performed. **B)** The MIC of each strain (X1-X12) under cefotaxime exposure was measured following passages 0, 2, 4, 6, 8 and 10, these values are plotted. The SHV gene was sequenced following each passage. Geometric shapes indicate distinct mutations at the earliest time point they were detected. **C)** A partial collateral response matrix showing the fold-change in susceptibility for the twelve replicates at passage 10 under exposure to four antibiotics: piperacillin (PIP), ticarcillin/clavulanate (TCC) and ampicillin/sulbactam (AMS) and ceftolozane/tazobactam (CFL). Differential collateral response is observed for PIP, TCC and AMS. Inset stars indicate value is a lower bound for fold-increase in resistance.

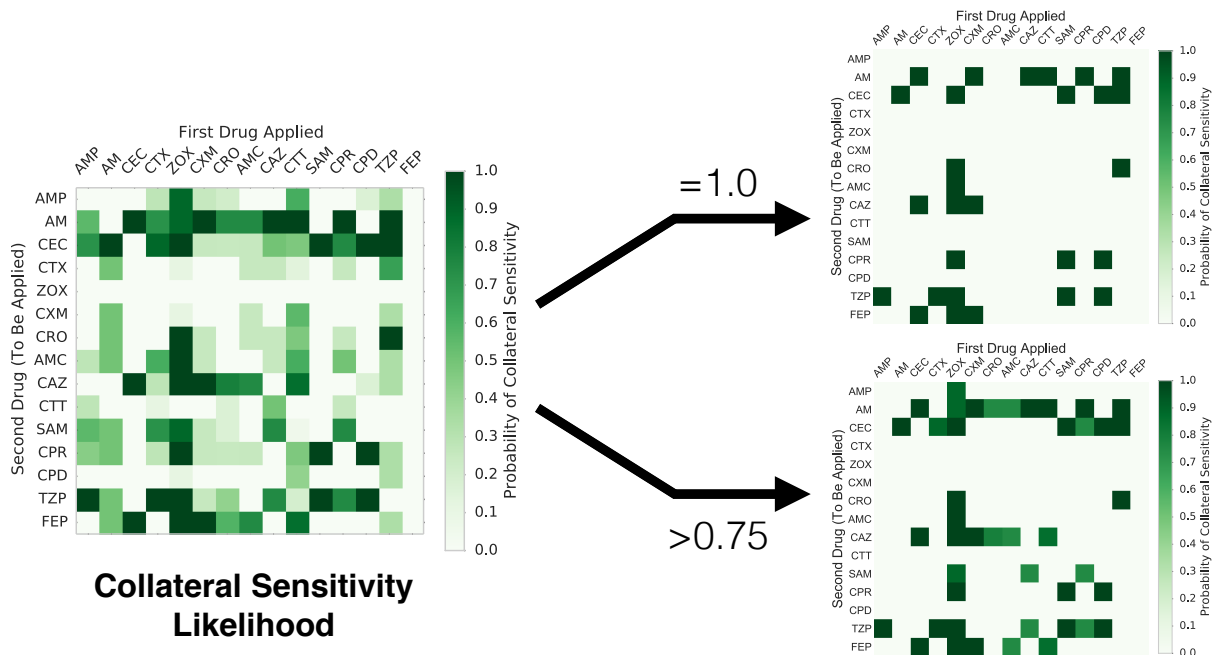

**Figure 4. Collateral sensitivity likelihood.** (Left) The table of collateral sensitivity likelihoods (CSLs) derived from the mathematical model. Each entry indicates the likelihood that the first drug (rows) induces increased sensitivity in the second (columns). (Right) The CSL table thresholded for drugs with  $p = 1.0$  (top) and  $p \geq 0.75$  (bottom) probability of inducing collateral sensitivity.

157 collateral sensitivity between drugs, we propose that *collateral sensitivity likelihoods* (CSLs) are  
 158 instead reported. For example, Figure 4 shows an example table of collateral sensitivity likelihoods  
 159 derived from the *in silico* evolution model. By looking for drug pairs with a high likelihood  
 160 ( $p > 0.75$ ) of collateral sensitivity (instead of guaranteed  $p = 1.0$ ) we see that the number  
 161 of potentially effective drug pairs is increased and further, the inherent risk associated with  
 162 each pair is explicitly stated. To empirically derive CSLs will likely require novel experimental  
 163 approaches. We propose two here: firstly, high throughput *in vitro* evolution experiments, likely  
 164 facilitated by automation of the experimental process [26]. Secondly, as drug sequences are  
 165 frequently prescribed in the clinic, we propose the distributed collection of matched pre- and  
 166 post-therapy drug sensitivity assays, possibly coupled with genomic sequencing, to permit the  
 167 derivation of CSLs. A similar approach is already employed in the treatment of HIV to monitor  
 168 the evolution of drug resistance [9, 13]. Regardless of the approach taken to derive CSLs, what is  
 169 clear is that we must move beyond the present methodology of designing drug sequences through  
 170 low-replicate-number experimental evolution, and towards an evolutionarily informed strategy  
 171 that explicitly accounts for the inherent stochasticity of evolution.

## 172 **Methods**

### 173 **Mathematical Modelling of Evolution**

174 The probability for evolutionary trajectories through the empirically derived fitness landscapes  
175 were calculated from a previously described mathematical model [17]. Briefly, the population is  
176 assumed to be isogenic and subject to Strong Selection Weak Mutation (SSWM) evolutionary  
177 dynamics. Thus, the population genotype (taken from domain  $\{0, 1\}^4$ ) is modelled as periodically  
178 replaced by a fitter (as determined by the landscape) neighbouring genotype (defined as any  
179 genotype whose Hamming distance from the population genotype is equal to one). This process  
180 is stochastic and the likelihood of a genotype,  $j$ , replacing the present population genotype,  $i$ , is  
181 given by

$$\mathbb{P}(i \rightarrow j) = \begin{cases} \frac{(f(j)-f(i))^r}{\sum_{\substack{g \in \{0,1\}^N, \text{Ham}(i,g)=1 \\ f(g)-f(i)>0}} (f(g)-f(i))^r} & \text{if } f(j) > f(i) \text{ and } \text{Ham}(i, j) = 1 \\ 0 & \text{otherwise} \end{cases} . \quad (1)$$

182 Where no such fitter neighbour exists, the process is terminated. The value of  $r$  determines the  
183 extent to which the fitness benefit of a mutation biases the likelihood that it becomes the next  
184 population genotype. We take  $r = 0$ , corresponding to fixation of the first arising resistance  
185 conferring mutation, but our results are robust to changes in  $r$  (See Supplementary Note for  
186 details).

187 For the simulations of *in vitro* evolutionary experiments, we assume an initial genotype  
188 of  $g_0 = 0000$  and determine the final population genotype by sampling from the model until  
189 termination at a local optimum of fitness, say  $g^*$ . Simulated collateral response was calculated  
190 as the fold difference between  $g_0$  and  $g^*$  in a second fitness landscape.

191 The code used to implement the model, produce the figures and analyse the experimental  
192 data is available upon request and will be made publicly available upon publication.

### 193 **Experimental Adaptation to Cefotaxime**

194 All 12 evolutionary replicates were derived from *E. coli* DH10B carrying phagemid pBC SK(-)  
195 expressing the  $\beta$ -lactamase gene SHV-1 [21]. All evolutionary experiments were performed using  
196 Mueller-Hinton agar.

197 Using a spiral plater, cefotaxime solution was applied to Mueller Hinton (MH) agar plates in a  
198 continuously decreasing volume equivalent to a thousand-fold dilution. *E. coli* DH10B pBCSK(-)  
199  $bla_{SHV-1}$  colonies were suspended to a concentration of  $7 \log_{10}$  CFU/ml in MH broth. Antibiotic



200 plates were then swabbed along the antibiotic gradient with the bacterial suspension. Plates  
201 were incubated overnight at 37°C. The most resistant colonies, as measured by the distance of  
202 growth along the gradient, were resuspended and used to swab a freshly prepared antibiotic  
203 plate. The process was repeated for a total of 10 passages. The entire experiment was completed  
204 12 times using the same parental strain to generate the cefotaxime resistance strains X1–X12.

## 205 **Determination of Minimum Inhibitory Concentration**

206 The minimum inhibitory concentration of each of the antibiotics in Figure 3 was determined for  
207 both the parent strain and the 12 cefotaxime resistant strains X1-X12 according to guidelines  
208 outlined by the Clinical and Laboratory Standards Institute [3]. MICs were determined in  
209 triplicate and the mean value used in for analysis. The maximum concentration considered was  
210 4096  $\mu\text{g/ml}$ , where the MIC exceeded this concentration the precise value was not determined and  
211 a MIC of  $\geq 8192\mu\text{g/ml}$  was used in the analysis. In this case the associated collateral response  
212 value is delineated to indicate that it is a lower bound. For X1-X4 the MICs were determined for  
213 an extended panel of antibiotics (Supplementary Table 2).

## 214 **Collateral Sensitivity Analysis**

215 Collateral sensitivity (or resistance), as depicted in Figure 3, was determined from the mean  
216 MIC values for the parent and passage 10 adapted strains (X1 - X12). For strains  $x = 1 \dots 12$   
217 the collateral response to an antibiotic,  $d$ , is calculated as

$$\text{CR} = \log_2 \left( \frac{\text{MIC}_d(X_x)}{\text{MIC}_d(\text{parental})} \right) \quad (2)$$

## 218 **Sequencing and Analysis**

219 Plasmid DNA was isolated using the Wizard Plus Minipreps DNA purification systems (Promega).  
220 Sequencing of the SHV gene was performed using M13 primers (MCLab, Harbor Way, CA).

## 221 **Acknowledgements**

222 DN would like to thank the Engineering and Physical Sciences Research Council (EPSRC) for  
223 generous funding for his doctoral studies (ref: OUCL/DN/2013). JGS is grateful to the NIH  
224 for their generous loan repayment program. ARAA would like to acknowledge the National  
225 Cancer Institute (NCI) funded Physical Science Oncology Center grant, U54CA193489. This  
226 study was supported in part by funds and facilities provided by the Cleveland Department of

227 Veterans Affairs, Veterans Affairs Merit Review Program award number 1I01BX001974, from  
228 the Biomedical Laboratory Research & Development Service of the VA Office of Research and  
229 Development and the Geriatric Research Education and Clinical Center VISN 10 to R.A.B. This  
230 work was also supported by funds from the National Institute of Allergy and Infectious Diseases  
231 of the National Institutes of Health under award numbers R01AI063517, R01AI072219, and  
232 R01AI100560 to R.A.B.

233 Funding organizations were not involved in the design and conduct of the study; collection,  
234 management, analysis, and interpretation of the data; and preparation, review, or approval of  
235 the manuscript. The content is solely the responsibility of the authors and does not necessarily  
236 represent the official views of the National Institutes of Health or the Department of Veterans  
237 Affairs.

## 238 References

- 239 1. Jessica MA Blair, Mark A Webber, Alison J Baylay, David O Ogbolu, and Laura JV  
240 Piddock. Molecular mechanisms of antibiotic resistance. *Nature Reviews Microbiology*, 13  
241 (1):42, 2015.
- 242 2. François Clavel and Allan J Hance. HIV drug resistance. *New England Journal of Medicine*,  
243 350(10):1023–1035, 2004.
- 244 3. Clinical and PA Laboratory Standards Institute, Wayne. *Performance standards for*  
245 *antimicrobial susceptibility testing: 22nd informational supplement. CLSI document M100-*  
246 *S22.*, 2012.
- 247 4. Julian Davies and Dorothy Davies. Origins and evolution of antibiotic resistance. *Microbi-*  
248 *ology and Molecular Biology Reviews*, 74(3):417–433, 2010.
- 249 5. Mari Rodriguez de Evgrafov, Heidi Gumpert, Christian Munck, Thomas T Thomsen, and  
250 Morten OA Sommer. Collateral resistance and sensitivity modulate evolution of high-level  
251 resistance to drug combination treatment in *Staphylococcus aureus*. *Molecular Biology*  
252 *and Evolution*, page msv006, 2015.
- 253 6. J Arjan Gm De Visser and Joachim Krug. Empirical fitness landscapes and the predictabil-  
254 ity of evolution. *Nature reviews. Genetics*, 15(7):480, 2014.
- 255 7. Andrew Dhawan, Daniel Nichol, Fumi Kinose, Mohamed E Abazeed, Andriy Marusyk,  
256 Eric B Haura, and Jacob G Scott. Collateral sensitivity networks reveal evolutionary  
257 instability and novel treatment strategies in ALK mutated non-small cell lung cancer.  
258 *Scientific Reports*, 7, 2017.

- 259 8. Mel Greaves and Carlo C Maley. Clonal evolution in cancer. *Nature*, 481(7381):306–313,  
260 2012.
- 261 9. Trevor Hinkley, João Martins, Colombe Chappey, Mojgan Haddad, Eric Stawiski, Jean-  
262 nette M Whitcomb, Christos J Petropoulos, and Sebastian Bonhoeffer. A systems analysis  
263 of mutational effects in HIV-1 protease and reverse transcriptase. *Nature Genetics*, 43(5):  
264 487–489, 2011.
- 265 10. Lejla Imamovic and Morten OA Sommer. Use of collateral sensitivity networks to design  
266 drug cycling protocols that avoid resistance development. *Science Translational Medicine*,  
267 5(204):204ra132–204ra132, 2013.
- 268 11. Yunxin J Jiao, Michael Baym, Adrian Veres, and Roy Kishony. Population diversity  
269 jeopardizes the efficacy of antibiotic cycling. *bioRxiv*, page 082107, 2016.
- 270 12. Seungsoo Kim, Tami D Lieberman, and Roy Kishony. Alternating antibiotic treatments  
271 constrain evolutionary paths to multidrug resistance. *Proceedings of the National Academy  
272 of Sciences*, 111(40):14494–14499, 2014.
- 273 13. Roger D Kouyos, Gabriel E Leventhal, Trevor Hinkley, Mojgan Haddad, Jeannette M  
274 Whitcomb, Christos J Petropoulos, and Sebastian Bonhoeffer. Exploring the complexity  
275 of the HIV-1 fitness landscape. *PLoS Genetics*, 8(3):e1002551, 2012.
- 276 14. James Mallet. The evolution of insecticide resistance: have the insects won? *Trends in  
277 Ecology & Evolution*, 4(11):336–340, 1989.
- 278 15. Portia M Mira, Kristina Crona, Devin Greene, Juan C Meza, Bernd Sturmfels, and Miriam  
279 Barlow. Rational design of antibiotic treatment plans: A treatment strategy for managing  
280 evolution and reversing resistance. *PLoS ONE*, 2015.
- 281 16. Christian Munck, Heidi K Gumpert, Annika I Nilsson Wallin, Harris H Wang, and  
282 Morten OA Sommer. Prediction of resistance development against drug combinations  
283 by collateral responses to component drugs. *Science Translational Medicine*, 6(262):  
284 262ra156–262ra156, 2014.
- 285 17. Daniel Nichol, Peter Jeavons, Alexander G Fletcher, Robert A Bonomo, Philip K Maini,  
286 Jerome L Paul, Robert A Gatenby, Alexander RA Anderson, and Jacob G Scott. Steering  
287 evolution with sequential therapy to prevent the emergence of bacterial antibiotic resistance.  
288 *PLoS Computational Biology*, 11(9):e1004493, 2015.

- 289 18. Adam C Palmer, Erdal Toprak, Michael Baym, Seungsoo Kim, Adrian Veres, Shimon  
290 Bershtein, and Roy Kishony. Delayed commitment to evolutionary fate in antibiotic  
291 resistance fitness landscapes. *Nature Communications*, 6:7385, 2015.
- 292 19. Patrick C Phillips. Epistasis—the essential role of gene interactions in the structure and  
293 evolution of genetic systems. *Nature Reviews Genetics*, 9(11):855, 2008.
- 294 20. Frank J Poelwijk, Daniel J Kiviet, Daniel M Weinreich, and Sander J Tans. Empirical  
295 fitness landscapes reveal accessible evolutionary paths. *Nature*, 445(7126):383–386, 2007.
- 296 21. Louis B Rice, Lenore L Carias, Andrea M Hujer, Mary Bonafede, Rebecca Hutton, Claudia  
297 Hoyen, and Robert A Bonomo. High-level expression of chromosomally encoded SHV-1  
298  $\beta$ -lactamase and an outer membrane protein change confer resistance to ceftazidime and  
299 piperacillin-tazobactam in a clinical isolate of *Klebsiella pneumoniae*. *Antimicrobial Agents  
300 and Chemotherapy*, 44(2):362–367, 2000.
- 301 22. Jacob Scott and Andriy Marusyk. Somatic clonal evolution: A selection-centric perspective.  
302 *Biochimica et Biophysica Acta (BBA)-Reviews on Cancer*, 1867(2):139–150, 2017.
- 303 23. Longzhi Tan, Stephen Serene, Hui Xiao Chao, and Jeff Gore. Hidden randomness between  
304 fitness landscapes limits reverse evolution. *Physical Review Letters*, 106(19):198102, 2011.
- 305 24. Daniel M Weinreich, Nigel F Delaney, Mark A DePristo, and Daniel L Hartl. Darwinian  
306 evolution can follow only very few mutational paths to fitter proteins. *Science*, 312(5770):  
307 111–114, 2006.
- 308 25. Sewall Wright. The roles of mutation, inbreeding, crossbreeding and selection in evolution.  
309 In *Proceedings of the Sixth International Congress on Genetics*, volume 1, pages 356–366,  
310 1932.
- 311 26. Mari Yoshida, Sabrina Galiñanes Reyes, Soichiro Tsuda, Takaaki Horinouchi, Chikara  
312 Furusawa, and Leroy Cronin. Time-programmable drug dosing allows the manipulation,  
313 suppression and reversal of antibiotic drug resistance in vitro. *Nature Communications*, 8,  
314 2017.
- 315 27. Helena Yu, Maria E Arcila, Natasha Rekhtman, Camelia S Sima, Maureen F Zakowski,  
316 William Pao, Mark G Kris, Vincent A Miller, Marc Ladanyi, and Gregory J Riely. Analysis  
317 of mechanisms of acquired resistance to EGFR TKI therapy in 155 patients with EGFR-  
318 mutant lung cancers. *Clinical cancer research*, pages clincanres–2246, 2013.

- 319 28. Boyang Zhao, Joseph C Sedlak, Raja Srinivas, Pau Creixell, Justin R Pritchard, Bruce  
320 Tidor, Douglas A Lauffenburger, and Michael T Hemann. Exploiting temporal collateral  
321 sensitivity in tumor clonal evolution. *Cell*, 165(1):234–246, 2016.
