## Antibiotic collateral sensitivity is contingent on the repeatability of evolution

Daniel Nichol<sup>1,2,†,\*</sup>, Joseph Rutter<sup>3</sup>, Christopher Bryant<sup>4</sup>, Andrea M Hujer<sup>3, 4</sup>, Sai Lek<sup>5</sup>, Mark D Adams<sup>5</sup>, Peter Jeavons<sup>1</sup>, Alexander RA Anderson<sup>2</sup>, Robert A Bonomo<sup>3,4,6,7,8,9</sup>, Jacob G Scott<sup>7,10,11\*</sup>

**1 Department of Computer Science, University of Oxford, Oxford, UK**

**2 Department of Integrated Mathematical Oncology, H. Lee Moffitt Cancer Center and Research Institute, Tampa, FL, USA**

**3 Research Service, Louis Stokes Department of Veterans Affairs Hospital, Cleveland, OH, USA**

**4 Department of Medicine, Case Western Reserve University School of Medicine, Cleveland, OH, USA**

**5 The Jackson Laboratory for Genomic Medicine, 10 Discovery Dr, Farmington, CT, USA**

**6 Departments of Biochemistry, Molecular Biology and Microbiology, and Pharmacology, Case Western Reserve University School of Medicine, Cleveland, OH, USA**

**7 Center for Proteomics and Bioinformatics, Case Western Reserve University School of Medicine, Cleveland, OH, USA**

**8 Medicine Service and Geriatric Research Education and Clinical Center (GRECC), Louis Stokes Cleveland Department of Veterans Affairs Medical Center, Cleveland, OH, USA**

**9 CARES, CWRU-VA Center for Antibiotic Resistance and Epidemiology, Cleveland, OH, USA**

**10 Wolfson Centre for Mathematical Biology, Mathematical Institute, University of Oxford, Oxford, UK**

**11 Departments of Translational Hematology and Oncology Research and Radiation Oncology, Cleveland Clinic, Cleveland, OH, USA**

**† Evolutionary Genomics & Modelling Lab, Centre for Evolution and Cancer, The Institute of Cancer Research, London, UK**

**\* [daniel.nichol@icr.ac.uk](mailto:daniel.nichol@icr.ac.uk) (DN); [scottj10@ccf.org](mailto:scottj10@ccf.org) (JGS)**

1

## 2 **Abstract**

3 Antibiotic resistance represents a growing health crisis that necessitates the immediate discovery  
4 of novel treatment strategies. One such strategy is the identification of collateral sensitivities,  
5 wherein evolution under a first drug induces susceptibility to a second. Here, we report that  
6 sequential drug regimens derived from *in vitro* evolution experiments may have overstated thera-  
7 peutic benefit, predicting a collaterally sensitive response where cross resistance ultimately occurs.  
8 We quantify the likelihood of this phenomenon by use of a mathematical model parametrised  
9 with combinatorially complete fitness landscapes for *Escherichia coli*. Through experimental  
10 evolution we then verify that a second drug can indeed stochastically exhibit either increased  
11 susceptibility or increased resistance when following a first. Genetic divergence is confirmed as  
12 the driver of this differential response through targeted and whole genome sequencing. Taken  
13 together, these results highlight that the success of evolutionarily-informed therapies is predicated  
14 on a rigorous probabilistic understanding of the contingencies that arise during the evolution of  
15 drug resistance.

16

## 17 Introduction

18 The emergence of drug resistance is governed by Darwinian dynamics, wherein resistant  
19 mutants arise stochastically in a population and expand under the selective pressure of therapy [1].  
20 These evolutionary principles underpin resistance to the presently most effective therapies for  
21 bacterial infections [2], cancers [3], viral infections [4] and disparate problems such as the  
22 management of invasive species and agricultural pests [5]. Biological mechanisms of drug  
23 resistance often carry a fitness cost in the absence of the drug and further, different resistance  
24 mechanisms can interact with one another to produce non-additive fitness effects, a phenomenon  
25 known as epistasis [6]. These trade-offs can induce rugged fitness landscapes, potentially  
26 restricting the number of accessible evolutionary trajectories to high fitness [7, 8] or rendering  
27 evolution irreversible [9].

28 Identifying evolutionary trade-offs forms the basis of an emerging strategy for combating  
29 drug resistance; prescribing sequences of drugs wherein the evolution of resistance to the first  
30 induces susceptibility to the next [10, 11, 12, 13]. Where this occurs, the first drug is said to  
31 induce *collateral sensitivity* in the second. Conversely, where the first drug induces increased  
32 resistance in the second, *collateral* (or *cross*) *resistance* has occurred. Recently, *in vitro* evolution  
33 experiments have been performed, in both bacteria [10, 14, 15, 16, 17, 18] and cancers [19, 20],  
34 to identify drug pairs or sequences exhibiting collateral sensitivity. One common protocol for  
35 these experiments proceeds by culturing a population in increasing concentrations of a drug to  
36 induce resistance, and then assaying the susceptibility of the resultant population to a panel  
37 of potential second-line therapies. From these experiments, sequences or cycles of drugs in  
38 which each induces collateral sensitivity in the next have been suggested as potential therapeutic  
39 strategies to extend the therapeutic efficacy of a limited pool of drugs [10, 20]. For some cancer  
40 therapies, which often have severe side-effects and high toxicity, such sequential therapies may  
41 be the only way to combine the use of multiple drugs.

42 Drug pairs that are identified as collaterally sensitive in a small number of *in vitro* evolutionary  
43 replicates may not in fact induce collateral sensitivity each time they are applied. This hypothesis  
44 arises from the observation that evolution is not necessarily repeatable; resistance to a drug can  
45 arise through multiple different mechanisms, as has been observed in cancers [21] and bacteria [22].  
46 Further, one mechanism may confer resistance to a second drug, whilst another may induce  
47 increased susceptibility, as was recently demonstrated in a drug screen of over 3000 strains of  
48 *Staphylococcus aureus* [23]. In previous experimental evolution studies to identify collateral  
49 sensitivity this phenomenon has been directly observed. For example, Barbosa et al. [24] observed

50 contrasting collateral response in evolutionary replicates of *Pseudomonas aeruginosa*. Oz et  
51 al. [25] observed the same phenomenon in *E. coli* wherein a pair of evolutionary replicates  
52 was performed under exposure to the ribosomal (30S) inhibitor tobramycin, resulting in one  
53 exhibiting increased sensitivity to chloramphenicol and one exhibiting increased resistance.  
54 Similar effects are evident in cancer studies. Zhao et al. [19] observed that the sensitivity of a  
55 BCR-ABL leukaemia cell line to cabozantinib can both increase and decrease following exposure  
56 to bosutinib, and identified a single nucleotide variation responsible for this differential collateral  
57 response.

58 The extent of the impact of differential collateral response on the design of sequential drug  
59 therapies is not yet fully understood. Here, we provide a clear evolutionary explanation for  
60 differential patterns of collateral response through a combination of mathematical modelling  
61 and experimental evolution. Through mathematical modelling we demonstrate the extent to  
62 which the existence of multiple evolutionary trajectories to drug resistance can render collateral  
63 sensitivities stochastic, and discuss the implications for *in vitro* experimental evolution. We  
64 next empirically demonstrate the existence of multiple trajectories in the evolution of *E. coli*  
65 through *in vitro* experimental evolution. Previous studies have explored the collateral response  
66 by considering all pairs from a pool of antibiotics, each with a small number of evolutionary  
67 replicates [10, 14, 15, 17]. We instead perform 60 parallel evolutionary replicates of *E. coli*  
68 under cefotaxime to demonstrate the extent of heterogeneity in second line drug sensitivity.  
69 Through genomic sequencing we confirm that different mutations (i.e. different evolutionary  
70 trajectories) are responsible for this heterogeneity. Critically, we find that collateral sensitivity is  
71 never universal, and is in fact rare. Finally, we derive *collateral sensitivity likelihoods* which we  
72 argue are critical statistical benchmarks for the clinical translation of sequential drug therapies.

73

## 74 Results

75

### 76 Mathematical Modelling of Evolution

77 The potential impact of divergent evolution can be conceptualised in the classical fitness  
78 landscape model of Wright [26], wherein genotypes are projected onto the two dimensional  $x - y$   
79 plane and fitness represented as the height above this plane. Evolution can be viewed as a  
80 stochastic ‘up-hill’ walk in this landscape wherein divergence can occur at a saddle. Figure 1  
81 shows such a schematic fitness landscape annotated to demonstrate the capacity for divergent  
82 evolution and the potential effects on collateral sensitivity.

83 Previous studies have attempted to empirically determine the structure of the fitness landscape  
84 for a number of organisms and under different drugs [27]. In these studies, a small number of

85 mutations associated with resistance are first identified. Strains are engineered corresponding  
86 to all possible combinations of presence and absence of these mutations and the fitness of each  
87 strain is measured by a proxy value, for example minimum inhibitory concentration (MIC) of a  
88 drug or average growth rate under a specific dose. These measurements are combined with the  
89 known genotypes to form a fitness landscape. However, to derive fitness landscapes through this  
90 method, the number of strains that must be engineered grows exponentially with the number of  
91 mutations of interest. Thus only small, combinatorially complete, portions of the true fitness  
92 landscape can be measured, for example consisting of 2-5 alleles [7, 27, 28]. Nevertheless, these  
93 restricted fitness landscapes can provide valuable insight into the evolution of drug resistance.

94 Mira et al. [29] derived fitness landscapes for *E. coli* with all combinations of four fitness  
95 conferring mutations (M69L, E104K, G238S and N276D) in the TEM gene and measured fitness  
96 under 15 different  $\beta$ -lactam antibiotics (See Supplementary Figure 1, Supplementary Table 1),  
97 using the average growth rate (over 12 replicates) as a proxy of fitness. Of these 15 landscapes,  
98 14 were identified as having multiple local optima of fitness, indicating the potential for the  
99 divergence of evolutionary trajectories. We utilised these landscapes, coupled with mathematical  
100 modelling [12] (see Methods), to estimate the likelihood of the different evolutionary trajectories  
101 from a wild-type genotype (denoted 0000) to each of the fitness optima. Using this model, we  
102 performed *in silico* assays for collateral sensitivity, mirroring the approach taken by Imamovic  
103 and Sommer [10] (Figure 2). For each drug, we first stochastically simulated an evolutionary  
104 trajectory from the wild-type genotype to a local fitness optimum genotype and then, for all  
105 other landscapes, compared the fitness of this local optimum genotype to that of the wild-type.  
106 A schematic of this simulation is shown in Figure 2(A). Figure 2(B) shows an example of two  
107 evolutionary trajectories that can arise stochastically in this model under the fitness landscape  
108 for ampicillin.

109 We exhaustively enumerated all tables of collateral response that can arise under this model  
110 (See Supplementary Figures 2-10 for further details). Figure 2(C) shows the best case (most  
111 susceptible following evolution), worst case (highest resistance following evolution) and mostly  
112 likely collateral response tables that arose in this analysis, along with the mean collateral response  
113 table (expectation of collateral response for each pair). This analysis suggests that there is  
114 remarkable variation in collateral response arising solely from the stochastic nature of mutation  
115 that ultimately drives evolution under a first drug. Indeed, we find a total of 82,944 unique tables  
116 can arise, of which the most likely occurs with probability 0.0023. Amongst the 225 ordered  
117 drug pairs, only 28 show a guaranteed pattern of collateral sensitivity, whilst a further 94 show a  
118 pattern of guaranteed cross resistance. For 88 pairs, the first drug can induce either collateral  
119 sensitivity or cross resistance in the second as a result of divergent evolution under the first drug.  
120 Critically, if a collateral response table is generated by stochastic *in silico* simulation, and a

121 collaterally sensitive drug pair chosen at random from this table, then the expected probability  
122 that first of these two drugs will induce cross resistance in the second is 0.513 (determined from  
123  $10^6$  simulations of this process).

124

## 125 **Experimental Evolution Induces Heterogeneous Collateral Response**

126 The mathematical model used above represents a simplification of biological reality as the  
127 assumption of a monomorphic population need not hold and the parametrisation is made using  
128 incomplete fitness landscapes. To experimentally validate our predictions, we verified the existence  
129 of divergent collateral response through experimental evolution. Mirroring previous experimental  
130 approaches [10, 16, 18, 19, 20], we performed *in vitro* evolution of *E. coli* (strain DH10B carrying  
131 phagemid pBC SK(-) 198, expressing the *beta*-lactamase gene SHV-1) in the presence of the  
132  $\beta$ -lactam antibiotic cefotaxime. Bacterial populations were grown using the gradient plate  
133 method with concentrations of cefotaxime varying between  $0.01 \mu\text{g ml}^{-1}$  and  $1000 \mu\text{g ml}^{-1}$  over  
134 a course of 10 passages lasting 24 hours (See Figure 3(A) and Methods for details). In total,  
135 60 replicates of experimental evolution were performed. We denote the resulting populations  
136 by X1-X60. For replicates X1-X12, aliquots were taken following each second passage and the  
137 minimum inhibitory concentration (MIC) to a panel of second line drugs assayed. A time-series  
138 for the MIC of X1-X12 replicates under cefotaxime is shown in Figure 3(B). As expected, the  
139 replicates exhibit increased resistance to cefotaxime over the 10 passages, although with varying  
140 magnitude and different trajectories.

141 For each of a panel of 8 second-line antibiotics (Table 1), the MIC for the replicates X1-X60 was  
142 determined following passage 10, in addition to the MIC for the parental strain (Supplementary  
143 Dataset 1, Methods). Figure 4 shows how the MICs of X1-X60 differ from the parental line. As  
144 predicted, we find that the collateral change in sensitivity is highly heterogeneous, and show  
145 that both collateral sensitivity and cross resistance can arise to the antibiotics piperacillin (PIP),  
146 ticarcillin/clavulanate (TIC) and ampicillin/sulbactam (SAM).

147

## 148 **Genomic Profiling Reveals Divergent Evolution**

149 Differential patterns of drug resistance could be driven by the different replicates having  
150 experienced different numbers of sequential mutations along a single trajectory wherein each  
151 induces a shift in response (temporal collateral sensitivity [19]), by evolutionary divergence at a  
152 branching point in the landscape or by non-genetic mechanisms of resistance. To elucidate the  
153 underlying mechanisms, we first performed targeted sequencing of the SHV gene for each of the 10  
154 passage time points for 12 evolutionary replicates (X1-X12) (Figure 3(B)). Through this analysis  
155 we identified five variants of SHV-1 amongst the 12 replicates. X1, X5, X7-X9 and X11 all

156 possess wild-type SHV-1, X2 possesses the substitution G242S, X3 possesses G238C, X4 and X6  
157 both possess G238A, and X10 and X12 both possess G238S. This analysis revealed no evidence  
158 of double substitutions in SHV, indicating a minimum of four fitness conferring substitutions  
159 that can occur in SHV-1 during exposure to cefotaxime, and confirming the existence of a  
160 multi-dimensional evolutionary branching point in the fitness landscape. Further, the sensitivity  
161 of the population to a second drug appears to be (at least partially) dependent on which of these  
162 substitutions occurs (Figures 3 and 4). For example, replicate X3 (harbouring G238C) exhibits  
163 a significant increase in susceptibility to TIC, PIP and SAM, whilst those replicates found to  
164 harbour wild-type SHV-1, or the other SNVs, exhibit either cross-resistance or no significant  
165 change in susceptibility to these drugs.

166 Through targeted sequencing of SHV alone we cannot not exclude the possibility that  
167 mutations in other genes, or large scale genomic alterations such as insertions or deletions, drive  
168 further divergence in collateral response. To explore whether additional background mutations  
169 arose during selection, we produced draft genome sequences for the replicates X1-X12 after  
170 passage 10 and looked for evidence of additional mutations. This genomic data confirmed the  
171 SHV-1 mutations found by sequencing of PCR products as described above. Nine of the twelve  
172 replicates contained additional mutations that include single-nucleotide variants (SNVs), large  
173 (>5kb) deletions, and replicate-specific sites for insertion of IS1D (Table 2). *OmpC* encodes  
174 a membrane surface protein and *envZ* is responsible for osmoregulation by regulation of the  
175 expression of OmpC and other membrane proteins [30]. This suggests that drug resistance in X8,  
176 X9, X10 and X11 may be driven by mutations that result in restricted drug uptake at the cell  
177 membrane. Indeed, mutations in *envZ* and cell surface proteins have been previously implicated  
178 as drivers of antibiotic resistance [31, 32, 33]. Stress-regulation through osmoregulation has  
179 been previously identified as inducing a trade-off with nutritional competence [34], suggesting  
180 that although these replicates do not exhibit collateral sensitivity, the resistant cells could face  
181 a fitness cost in the absence of drug. Similar patterns of fitness trade-off have been exploited  
182 in cancer treatments by using dose-modulation (adaptive) therapies that extend survival by  
183 inducing competition between sensitive and resistance cells [35, 36].

184 We conclude that mutations in SHV-1 are the primary drivers of cefotaxime resistance as  
185 they are associated with the most substantial increases in MIC. For example, for replicate X12,  
186 which exhibits the highest endpoint MIC, no additional mutations were detected. In contrast,  
187 X1, X5, X8, X9, and X11 all had genomic mutations, lacked SHV-1 variants, and had the lowest  
188 final cefotaxime MIC. We excluded the possibility of amplifications of SHV-1 by consideration  
189 of read depth ratios. The ratio of reads mapped to the gene and reads mapped to the plasmid  
190 backbone was very similar across all samples. The ratio of plasmid reads to chromosomal reads  
191 did differ across samples, but the fraction of plasmid-derived reads did not correlate with the



192 MIC for cefotaxime (Supplementary Dataset 2) and is more likely due to variation in extraction  
193 efficiency for chromosomal versus plasmid DNA. We excluded the possibility of amplifications or  
194 deletions in chromosomal genes by consideration of read depth ratios (Supplementary Figure 11).

195 We note that X7 exhibits an increase in resistance to cefotaxime without any associated  
196 genomic alterations. Similarly X1, X5, X9 and X12 exhibit mutations, but none that are known  
197 to be associated with antibiotic resistance. Thus, we can infer that physiological adaptation or  
198 epigenetic adaptation may also be driving resistance to cefotaxime.

199

## 200 Collateral Sensitivity Likelihoods

201 Our experimental results demonstrate that the evolution of antibiotic resistance is non-  
202 repeatable, and that the efficacy of a second-line drug can depend on the specific evolutionary  
203 trajectory that occurs under a first. As such, where a pair of drugs exhibit collateral sensitivity in  
204 a small number of experimental replicates, it need not be the case that collateral sensitivity always  
205 occurs. Rather than give up entirely on the concept of collateral sensitivity between drugs, we  
206 propose that *collateral sensitivity likelihoods* (CSLs) should be derived. By deriving the likelihood  
207 of collateral sensitivity between drugs, we can quantify the risk associated with different drug  
208 sequences. Figure 5(A) shows an example table of collateral sensitivity likelihoods derived from  
209 the *in silico* evolution model. We note that whilst there exist 28 drug pairs exhibiting guaranteed  
210 collateral sensitivity ( $P = 1.0$ , right), there also 16 others with likelihood  $1.0 > P > 0.75$  of  
211 collateral sensitivity. Where collateral sensitivity is assayed from a small number of experimental  
212 evolution replicates, these drug pairs may appear to exhibit universal collateral sensitivity and  
213 could thus unexpectedly fail stochastically. Conversely, if no universally collaterally sensitive  
214 drugs were known, drug pairs exhibiting a high likelihood of collateral sensitivity might represent  
215 the best option available.

216 Figure 5(B) shows the experimentally derived CSLs for antibiotics administered following  
217 cefotaxime. We find that collateral sensitivity is rare, with  $P = \frac{1}{30}$  for ticarcillin/clavulanate  
218 (TIC) being the most likely. If we also consider the likelihood that sensitivity of the second-line  
219 drug is unchanged, then it is clear that piperacillin (PIP) or gentamicin (GNT) are the best  
220 second-line drugs following cefotaxime (amongst those we have assayed). Conversely, cross  
221 resistance is near universal in cefazolin (CFZ) and ceftolozane/tazobactam (CFT). For puromycin  
222 (PMC) and ampicillin/sulbactam (SAM), we estimate that cross resistance occurs with probability  
223  $P > 0.5$ , but that the probability of no-change or collateral sensitivity is still high ( $P > 0.3$   
224 in both cases). Drugs such as these highlight the importance of deriving collateral sensitivity  
225 likelihoods by means of multiple evolutionary replicates, as a single evolutionary replicate may  
226 identify unchanged sensitivity where cross resistance is likely.

227



## 228 Discussion

229 We have demonstrated the existence of an evolutionary branching point in the fitness landscape  
230 of *E. coli* under cefotaxime that can induce divergent evolution and differential collateral response  
231 to second-line antibiotics. By means of 60 replicates of experimental evolution, we have estimated  
232 the likelihood of collateral sensitivity in each of 8 second-line therapies. Critically, we find that  
233 collateral sensitivity is never universal, and is in fact rare. Furthermore, by consideration of  
234 a mathematical model of evolution parametrised by small, combinatorially complete fitness  
235 landscapes, we have highlighted the extent and importance of evolutionary divergence. This  
236 modelling highlights that divergent collateral response is likely common (occurring in 14/15 drugs  
237 for which empirical landscapes were derived) and further, that even where collateral sensitivity  
238 is reported from a small number of evolutionary replicates, cross-resistance can still occur with  
239 high likelihood.

240 Taken together, our results indicate that we must take care when interpreting collateral  
241 sensitivity arising in low-throughput evolution experiments. To this end, we propose that collateral  
242 sensitivity likelihoods should be evaluated by use of multiple parallel evolutionary replicates  
243 to better capture the inherent stochasticity of evolution. The high-throughput experimental  
244 evolution necessary to accurately evaluate CSLs between many drug pairs could be facilitated by  
245 automated cell culture systems, such as the morbidostat developed by Toprak et al. [37] which  
246 incorporates automated optical density measurements and drug delivery to track and manipulate  
247 evolution.

248 It should be noted that although the evolution of pathological bacteria within the clinic is most  
249 likely stochastic, it is unclear whether the gradient plate system model used in the present study,  
250 and others [10], correctly captures this stochasticity. The gradient plate method proceeds by  
251 serial replating of bacterial populations that induces population bottlenecks and strong selection.  
252 This mode of population dynamics clearly differs from that which *E. coli* experience naturally.  
253 We note that our experimental results are derived only for the gradient plate method and that  
254 other protocols without serial passaging have also been explored [13]. Such experimental designs  
255 may exhibit less stochastic dynamics and thus permit the derivation of collateral sensitivity  
256 likelihoods with fewer replicates. Alternatively, it may be the case that additional stochasticity  
257 is introduced as evolutionary phenomena such as clonal interference, wherein multiple fitter  
258 clones compete, do not occur. To empirically determine collateral sensitivity likelihoods it may  
259 be the case that we must employ novel *in vitro* experimental techniques to more closely match  
260 *in vivo* dynamics. Here too, automated culture systems such as the morbidostat could help, as  
261 automated changes to the drug concentration can prevent the bacterial population expanding  
262 too rapidly, mitigating the need for serial replating and permitting high throughput experiments.

263 The mathematical model we have presented does not capture the full complexity of evolu-  
264 tion. For example, we do not account for deletions, insertions or duplications of genes such  
265 as SHV. Nevertheless, this model still proves useful in providing intuition about the extent to  
266 which stochasticity can drive differential collateral response. We can expect the introduction  
267 of additional mutational complexity to introduce further stochasticity. An immediate improve-  
268 ment to our modelling would be to extend the model to account for alternative population  
269 dynamics; for example, permitting heterogeneous populations, variable population sizes or drug  
270 pharmacodynamics. A further complication is that drug resistance can arise by physiological  
271 adaptations in addition to genetic mutation, which our mathematical modelling does not take into  
272 account. We see evidence for physiological adaptation in the evolution of the replicate X7 which  
273 exhibits increased resistance to cefotaxime without associated mutations. Further, changes in  
274 sensitivity arising from such phenotypic plasticity may be reversible over short time scales [20].  
275 Ultimately, by the use of extended mathematical models we may be able to better simulate  
276 *in vitro* experiments in order to understand how generalisable they are to *in situ* evolutionary  
277 dynamics [38].

278 As an alternative to high throughput evolutionary experiments, we note that drug sequences  
279 are frequently prescribed in the clinic. Thus, the distributed collection of matched pre- and  
280 post-therapy drug sensitivity assays, potentially coupled with genomic sequencing where this is  
281 feasible, could provide sufficient data to determine CSLs. This approach is particularly appealing  
282 as the CSLs derived would not be subject to the caveats regarding experimentally derived  
283 measures of collateral sensitivities outlined above. Further, clinically derived CSLs would readily  
284 account for non-genetic adaptations and inter-patient variabilities in physiology that may impact  
285 drug sensitivities. A similar approach has already been employed in the treatment of HIV to  
286 monitor the evolution of drug resistance [39, 40].

287 Regardless of the approach taken to derive CSLs, what is clear is that we must move beyond  
288 the present methodology of designing drug sequences through low-replicate-number experimental  
289 evolution, and towards an evolutionarily informed strategy that explicitly accounts for the  
290 inherent stochasticity of evolution.

## 291 Methods

### 292 Mathematical Modelling of Evolution

293 The probabilities for evolutionary trajectories through the empirically derived fitness landscapes  
294 were calculated from a previously published mathematical model [12]. Briefly, the population is  
295 assumed to be isogenic and subject to Strong Selection Weak Mutation (SSWM) evolutionary  
296 dynamics. Thus, the population genotype (taken from domain  $\{0, 1\}^4$ ) is modelled as periodically  
297 replaced by a fitter (as determined by the landscape) neighbouring genotype (defined as any  
298 genotype whose Hamming distance from the population genotype is equal to one). This process  
299 is stochastic and the likelihood of a genotype,  $j$ , replacing the present population genotype,  $i$ , is  
300 given by

$$\mathbb{P}(i \rightarrow j) = \begin{cases} \frac{(f(j)-f(i))^r}{\sum_{\substack{g \in \{0,1\}^N, \text{Ham}(i,g)=1 \\ f(g)-f(i)>0}} (f(g)-f(i))^r} & \text{if } f(j) > f(i) \text{ and Ham}(i, j) = 1 \\ 0 & \text{otherwise.} \end{cases} \quad (1)$$

301 Where no such fitter neighbour exists, the process is terminated. The value of  $r$  determines the  
302 extent to which the fitness benefit of a mutation biases the likelihood that it becomes the next  
303 population genotype. We take  $r = 0$ , corresponding to fixation of the first arising resistance  
304 conferring mutation, but our results are robust to changes in  $r$  (See Supplementary Note 1 for  
305 details).

306 For the simulations of *in vitro* evolutionary experiments, we assume an initial genotype  
307 of  $g_0 = 0000$  and determine the final population genotype by sampling from the model until  
308 termination at a local optimum of fitness, say  $g^*$ . Simulated collateral response was calculated as  
309 the fold difference between  $g_0$  and  $g^*$  in a second fitness landscape. Collateral response outcomes  
310 for all drug pairs are shown in Supplementary Figures 2-10.

### 311 Experimental Adaptation to Cefotaxime

312 All 60 evolutionary replicates were derived from *E. coli* DH10B carrying phagemid pBC SK(-)  
313 expressing the  $\beta$ -lactamase gene SHV-1 [41]. The SHV-1  $\beta$ -lactamase gene was subcloned into  
314 pBC SK(-) (Stratagene) from a clinical strain of *K. pneumoniae* 15571. In brief, a 1384 bp  
315 ScaI-ClaI DNA fragment containing the upstream flanking sequence, promoter, ribosomal binding  
316 site and intact open reading frame was cloned into pBC SK(-) at the EcoRV-ClaI sites. This  
317 clone was transformed into *E. coli* DH10B (ElectroMAX, Invitrogen).

318 Using a spiral plater, cefotaxime solutions were applied to Mueller Hinton (MH) agar plates

319 in a continuous, logarithmic dilution to achieve a radial concentration gradient of antibiotic from  
320 approximately 0.1-1000  $\mu\text{g ml}^{-1}$ . *E. coli* DH10B pBCSK(-) *bla*<sub>SHV-1</sub> colonies were suspended to  
321 a concentration of  $7\log_{10}$  CFU  $\text{ml}^{-1}$  in MH broth. Antibiotic plates were then swabbed along  
322 the antibiotic gradient with the bacterial suspension. Plates were incubated overnight at 37°C.  
323 The most resistant colonies, as measured by the distance of growth along the gradient, were  
324 resuspended and used to swab a freshly prepared gradient plate. The process was repeated for a  
325 total of 10 passages. The entire experiment was completed 60 times using the same parental  
326 strain to generate the cefotaxime resistance replicates X1–X60.

### 327 Determination of Minimum Inhibitory Concentration

328 The minimum inhibitory concentration of each antibiotic was determined for both the parent  
329 strain and the cefotaxime resistant replicates according to guidelines outlined by the Clinical  
330 and 314 Laboratory Standards Institute [42]. Briefly, bacterial strains were grown 18-20 hours  
331 in MH broth in a shaking incubator at 37°C. Cultures were diluted and an inoculum replicator  
332 used was to deliver  $10^4$  CFU to the surface of MH agar plates containing antibiotic. Plates were  
333 incubated at 37°C for 16-20 hours. The MIC was taken as the lowest concentration of antibiotic  
334 that completely inhibited growth. MICs were assayed in triplicate as series of 2-fold dilutions.  
335 Where the MIC exceeded the maximum concentration considered, 4096  $\mu\text{g ml}^{-1}$ , the precise  
336 value was not determined and a lower bound MIC of  $\geq 8192 \mu\text{g ml}^{-1}$  was taken.

337 The MIC was determined from the replicates by maximum likelihood estimation using a  
338 statistical model outlined by Weinreich et al. [7]. Briefly, we assume that the  $j^{\text{th}}$   $\log_2$  transformed  
339 MIC measurement for the  $i^{\text{th}}$  evolutionary replicate, under the drug  $d$ , denoted  $x_{i,j}^d$ , is determined  
340 as

$$x_{i,j}^d = m_i^d + \epsilon_{i,j,d} \quad (2)$$

341 where  $\epsilon_{i,j,d} = +1, 0, -1$  with probability  $e/2, 1 - e, e/2$  respectively. Here, each  $m_i^d$  denotes the  
342 true MIC for the  $i^{\text{th}}$  replicate (with  $i = 0$  denoting the parental line) and  $e$  denotes the likelihood  
343 of measurement error. We assume  $e$  is fixed across technical replicates, evolutionary replicates  
344 and drugs. Note the assumption that we never erroneously take a measurement that differs from  
345 the true MIC by greater than a factor of two. This is justified by noting that in no instance  
346 do the maximum and minimum MICs measured in our analysis differ by greater than  $4\times$  (See  
347 Supplementary Dataset 1).

348 Maximum likelihood estimates (mle) for  $m_i^d$  are used as the MICs in our analysis. The

349 likelihood function is given by

$$\mathcal{L}(x_{0,1}^1 \dots x_{60,3}^9 | m_1^1 \dots m_{60}^9, e) = \prod_{d=1}^9 \prod_{i=0}^{60} \prod_{j=1}^3 \left( (1-e)\delta_{x_{i,j}^d, m_i^d} + \frac{e}{2}\delta_{x_{i,j}^d, m_{i+1}^d} + \frac{e}{2}\delta_{x_{i,j}^d, m_{i-1}^d} \right) \quad (3)$$

350 where  $\delta$  denotes the Kronecker delta function. By observation, the mle for each  $m_i^d$  is given by  
351 the median of  $x_{i,1}^d$ ,  $x_{i,2}^d$  and  $x_{i,3}^d$ , except in the case that two of these values are precisely  $4\times$   
352 or  $\frac{1}{4}\times$  the other, in which case the mle is the mid-point between the maximum and minimum.  
353 Letting  $r$  denote the number of replicate/drug combinations in which all three measurements  
354 equal the mle,  $s$  denote the number in which  $2/3$  measurements equal the mle,  $t$  the number in  
355 which  $1/3$  equal the mle and  $u$  the number in which  $0/3$  equal the mle. Then the mle for  $e$  is  
356 given by

$$e = \frac{s + 2t + 3u}{3(r + s + t + u)}. \quad (4)$$

357 This identity can be verified by first principles (by taking the derivative of the likelihood function)  
358 but is also quite intuitive - it is simply the proportion of measurements that differ from the  
359 inferred mle for the MIC. In our experiment,  $r = 338$ ,  $s = 196$ ,  $t = 11$  and  $u = 4$ , which yields an  
360 mle for the measurement error rate of  $e = 0.14$ .

## 361 Collateral Sensitivity Analysis and Significance Testing

362 To determine collateral sensitivity (or cross resistance) we determined which evolutionary repli-  
363 cates exhibited a significantly different MIC from the parental line via a likelihood ratio test. In  
364 total, 60 comparisons were performed for each of the 9 drugs, yielding a total of 540 comparisons.  
365 A Bonferroni correction was used to account for multiple hypothesis testing. For those replicates  
366 exhibiting a significant ( $p < 0.05/540$ ) change in MIC, the collateral response was determined as

$$\text{CR} = m_i^d - m_0^d. \quad (5)$$

367 Otherwise, we set  $\text{CR} = 0$ .

## 368 Targeted Sequencing of SHV

369 Plasmid DNA was isolated using the Wizard Plus Minipreps DNA purification systems (Promega).  
370 Sequencing of the SHV gene was performed using M13 primers (MCLab, Harbor Way, CA).

371

## 372 Whole Genome Sequencing

373 For genome sequencing, total DNA was prepared using MasterPure Complete DNA Purifica-  
374 tion Kit (Epicentre; Madison, Wisconsin). NexteraXT libraries were prepared and sequenced  
375 on an Illumina NextSeq 500 at the Genomics Core at Case Western Reserve University. Paired  
376 sequence reads were mapped using bwa-mem to the DH10B genome (accession CP000948.1),  
377 the pBC SK(-) plasmid (<https://www.novoprolabs.com/vector/V12548>), and the SHV-1 gene  
378 (accession JX268740.1). Reads were also assembled into contigs using velvet [43]. Three ap-  
379 proaches were used to identify *de novo* mutations. First, single-nucleotide variants (SNVs) were  
380 called using the mapped reads using the Genome Analysis Toolkit (GATK) [44]. Second, large  
381 deletions were identified using a combination of detection of low-coverage regions of the reference  
382 based on read mapping results and BLAST searches between the DH10B reference sequence  
383 and the contigs. Insertion sequence (IS) elements present in the DH10B genome were identi-  
384 fied using ISfinder [45] and locations for IS elements were mapped in the contigs using ISseeker [46].  
385

## 386 Data Availability

387 All MIC measurements are available in Supplementary Dataset 1. All sequencing data are de-  
388 posited to the NCBI sequence read archive under accession code SUB4495092. The Python code  
389 used in the mathematical modelling and statistical analyses are available at: [https://github.com/Daniel-](https://github.com/Daniel-Nichol/CollateralSensitivityRepeatability)  
390 [Nichol/CollateralSensitivityRepeatability](https://github.com/Daniel-Nichol/CollateralSensitivityRepeatability).

## 391 Acknowledgements

392 DN would like to thank the Engineering and Physical Sciences Research Council (EPSRC) for  
393 generous funding for his doctoral studies (OUCL/DN/2013). JGS is grateful to the NIH for their  
394 generous loan repayment program and to the Paul Calabresi Career Development Award for  
395 Clinical Oncology (NIH K12CA076917). ARAA would like to acknowledge the National Cancer  
396 Institute (NCI) funded Physical Science Oncology Center grant, U54CA193489. Research reported  
397 in this publication was supported by the National Institute of Allergy and Infectious Diseases  
398 of the National Institutes of Health (NIH) under Award Numbers R01AI100560, R01AI063517,  
399 and R01AI072219 to R.A.B. This study was also supported in part by funds and/or facilities  
400 provided by the Cleveland Department of Veterans Affairs, Award Number 1I01BX001974 to  
401 R.A.B. from the Biomedical Laboratory Research & Development Service of the VA Office of  
402 Research and Development, and the Geriatric Research Education and Clinical Center VISN 10.  
403 The content is solely the responsibility of the authors and does not represent the official views of  
404 the Department of Veterans Affairs or the National Institutes of Health. The funders had no  
405 role in study design, data collection and interpretation, or the decision to submit the work for

406 publication.

407

## 408 Author Contributions

409 DN, RB and JS conceived of the experiment which was performed by JR, CB, and AH. MA  
410 and SL performed the genomic analysis. DN, AA, PJ, RB and JS analyzed the experimental  
411 data. DN, PJ, AA and JS conceived of the mathematical model which was implemented by  
412 DN. Mathematical results were analyzed by DN, PJ, AA and JS. All participated in writing the  
413 manuscript.

414

## 415 Competing Interests

416 The authors declare no competing interests.

## 417 References

- 418 1. Scott, J. & Marusyk, A. Somatic clonal evolution: a selection-centric perspective. *Biochim.*  
419 *Biophys. Acta Rev. Cancer* **1867**, 139–150 (2017).
- 420 2. Davies, J. & Davies, D. Origins and evolution of antibiotic resistance. *Microbiol. Mol.*  
421 *Biol. Rev.* **74**, 417–433 (2010).
- 422 3. Greaves, M. & Maley, C. C. Clonal evolution in cancer. *Nature* **481**, 306–313 (2012).
- 423 4. Clavel, F. & Hance, A. J. HIV drug resistance. *N. Engl. J. Med.* **350**, 1023–1035 (2004).
- 424 5. Mallet, J. The evolution of insecticide resistance: have the insects won? *Trends Ecol. Evol.*  
425 **4**, 336–340 (1989).
- 426 6. Phillips, P. C. Epistasis—the essential role of gene interactions in the structure and  
427 evolution of genetic systems. *Nat. Rev. Genet.* **9**, 855 (2008).
- 428 7. Weinreich, D. M., Delaney, N. F., DePristo, M. A. & Hartl, D. L. Darwinian evolution  
429 can follow only very few mutational paths to fitter proteins. *Science* **312**, 111–114 (2006).
- 430 8. Poelwijk, F. J., Kiviet, D. J., Weinreich, D. M. & Tans, S. J. Empirical fitness landscapes  
431 reveal accessible evolutionary paths. *Nature* **445**, 383 (2007).



- 432 9. Tan, L., Serene, S., Chao, H. X. & Gore, J. Hidden randomness between fitness landscapes  
433 limits reverse evolution. *Phys. Rev. Lett.* **106**, 198102 (2011).
- 434 10. Imamovic, L. & Sommer, M. O. Use of collateral sensitivity networks to design drug  
435 cycling protocols that avoid resistance development. *Sci. Transl. Med.* **5**, 204ra132–204ra132  
436 (2013).
- 437 11. Kim, S., Lieberman, T. D. & Kishony, R. Alternating antibiotic treatments constrain  
438 evolutionary paths to multidrug resistance. *Proc. Natl. Acad. Sci. U.S.A.* **111**, 14494–14499  
439 (2014).
- 440 12. Nichol, D. *et al.* Steering evolution with sequential therapy to prevent the emergence of  
441 bacterial antibiotic resistance. *PLoS Comput. Biol.* **11**, e1004493 (2015).
- 442 13. Fuentes-Hernandez, A. *et al.* Using a sequential regimen to eliminate bacteria at sublethal  
443 antibiotic dosages. *PLoS Biol.* **13**, e1002104 (2015).
- 444 14. Toprak, E. *et al.* Evolutionary paths to antibiotic resistance under dynamically sustained  
445 drug selection. *Nat. Genet.* **44**, 101 (2012).
- 446 15. Lázár, V. *et al.* Bacterial evolution of antibiotic hypersensitivity. *Mol. Syst. Biol.* **9**, 700  
447 (2013).
- 448 16. Munck, C., Gumpert, H. K., Wallin, A. I. N., Wang, H. H. & Sommer, M. O. Prediction  
449 of resistance development against drug combinations by collateral responses to component  
450 drugs. *Sci. Transl. Med.* **6**, 262ra156–262ra156 (2014).
- 451 17. Suzuki, S., Horinouchi, T. & Furusawa, C. Prediction of antibiotic resistance by gene  
452 expression profiles. *Nat. Commun.* **5**, 5792 (2014).
- 453 18. Rodriguez de Evgrafov, M., Gumpert, H., Munck, C., Thomsen, T. T. & Sommer, M. O.  
454 Collateral resistance and sensitivity modulate evolution of high-level resistance to drug  
455 combination treatment in staphylococcus aureus. *Mol. Biol. Evol.* **32**, 1175–1185 (2015).
- 456 19. Zhao, B. *et al.* Exploiting temporal collateral sensitivity in tumor clonal evolution. *Cell*  
457 **165**, 234–246 (2016).
- 458 20. Dhawan, A. *et al.* Collateral sensitivity networks reveal evolutionary instability and novel  
459 treatment strategies in ALK mutated non-small cell lung cancer. *Sci. Rep.* **7**, 1232 (2017).
- 460 21. Yu, H. *et al.* Analysis of mechanisms of acquired resistance to EGFR TKI therapy in 155  
461 patients with EGFR-mutant lung cancers. *Clin. Cancer Res.* clincanres–2246 (2013).

- 462 22. Blair, J. M., Webber, M. A., Baylay, A. J., Ogbolu, D. O. & Piddock, L. J. Molecular  
463 mechanisms of antibiotic resistance. *Nat. Rev. Microbiol.* **13**, 42 (2015).
- 464 23. Jiao, Y. J., Baym, M., Veres, A. & Kishony, R. Population diver-  
465 sity jeopardizes the efficacy of antibiotic cycling. *Preprint available at*  
466 <https://www.biorxiv.org/content/early/2016/10/20/082107> (2016).
- 467 24. Barbosa, C. *et al.* Alternative evolutionary paths to bacterial antibiotic resistance cause  
468 distinct collateral effects. *Mol. Biol. Evol.* **34**, 2229–2244 (2017).
- 469 25. Oz, T. *et al.* Strength of selection pressure is an important parameter contributing to the  
470 complexity of antibiotic resistance evolution. *Mol. Biol. Evol.* **31**, 2387–2401 (2014).
- 471 26. Wright, S. The roles of mutation, inbreeding, crossbreeding and selection in evolution. In  
472 *Proceedings of the Sixth International Congress on Genetics*, vol. 1, 356–366 (1932).
- 473 27. De Visser, J. A. G. & Krug, J. Empirical fitness landscapes and the predictability of  
474 evolution. *Nat. Rev. Genet.* **15**, 480 (2014).
- 475 28. Palmer, A. C. *et al.* Delayed commitment to evolutionary fate in antibiotic resistance  
476 fitness landscapes. *Nat. Commun.* **6**, 7385 (2015).
- 477 29. Mira, P. M. *et al.* Rational design of antibiotic treatment plans: a treatment strategy for  
478 managing evolution and reversing resistance. *PLoS One* **10**, e0122283 (2015).
- 479 30. Cai, S. J. & Inouye, M. EnvZ-OmpR interaction and osmoregulation in escherichia coli. *J.*  
480 *Biol. Chem.* **277**, 24155–24161 (2002).
- 481 31. Jaffe, A., Chabbert, Y. A. & Semonin, O. Role of porin proteins ompf and ompc in the  
482 permeation of beta-lactams. *Antimicrob. Agents Chemother.* **22**, 942–948 (1982).
- 483 32. Liu, Y.-F. *et al.* Loss of outer membrane protein c in escherichia coli contributes both to  
484 antibiotic resistance and escaping antibody-dependent bactericidal activity. *Infect. Immun.*  
485 **IAI-06395** (2012).
- 486 33. Adler, M., Anjum, M., Andersson, D. I. & Sandegren, L. Combinations of mutations in  
487 envz, ftsi, mrda, acrb and acrr can cause high-level carbapenem resistance in escherichia  
488 coli. *J. Antimicrob. Chemother.* **71**, 1188–1198 (2016).
- 489 34. Ferenci, T. Maintaining a healthy SPANC balance through regulatory and mutational  
490 adaptation. *Mol. Microbiol.* **57**, 1–8 (2005).

- 491 35. Gatenby, R. A., Silva, A. S., Gillies, R. J. & Frieden, B. R. Adaptive therapy. *Cancer Res.*  
492 **69**, 4894–4903 (2009).
- 493 36. Enriquez-Navas, P. M. *et al.* Exploiting evolutionary principles to prolong tumor control  
494 in preclinical models of breast cancer. *Sci. Transl. Med.* **8**, 327ra24–327ra24 (2016).
- 495 37. Toprak, E. *et al.* Building a morbidostat: an automated continuous-culture device for  
496 studying bacterial drug resistance under dynamically sustained drug inhibition. *Nat.*  
497 *Protoc.* **8**, 555 (2013).
- 498 38. Forde, S. E. *et al.* Understanding the limits to generalizability of experimental evolutionary  
499 models. *Nature* **455**, 220 (2008).
- 500 39. Hinkley, T. *et al.* A systems analysis of mutational effects in hiv-1 protease and reverse  
501 transcriptase. *Nat. Genet.* **43**, 487 (2011).
- 502 40. Kouyos, R. D. *et al.* Exploring the complexity of the HIV-1 fitness landscape. *PLoS Genet.*  
503 **8**, e1002551 (2012).
- 504 41. Rice, L. B. *et al.* High-level expression of chromosomally encoded SHV-1  $\beta$ -lactamase  
505 and an outer membrane protein change confer resistance to ceftazidime and piperacillin-  
506 tazobactam in a clinical isolate of *Klebsiella pneumoniae*. *Antimicrob. Agents Chemother.*  
507 **44**, 362–367 (2000).
- 508 42. Clinical & Laboratory Standards Institute, P., Wayne. *Performance standards for antimicrobial susceptibility testing: 22nd informational supplement. CLSI document M100-S22.*  
509 (2012).  
510
- 511 43. Zerbino, D. & Birney, E. Velvet: algorithms for de novo short read assembly using de  
512 bruijn graphs. *Genome Res.* gr-074492 (2008).
- 513 44. McKenna, A. *et al.* The genome analysis toolkit: a mapreduce framework for analyzing  
514 next-generation dna sequencing data. *Genome Res.* **20**, 1297–1303 (2010).
- 515 45. Siguier, P., Pérochon, J., Lestrade, L., Mahillon, J. & Chandler, M. Isfinder: the reference  
516 centre for bacterial insertion sequences. *Nucleic Acids Res.* **34**, D32–D36 (2006).
- 517 46. Adams, M. D., Bishop, B. & Wright, M. S. Quantitative assessment of insertion sequence  
518 impact on bacterial genome architecture. *Microb. Genomics* **2** (2016).

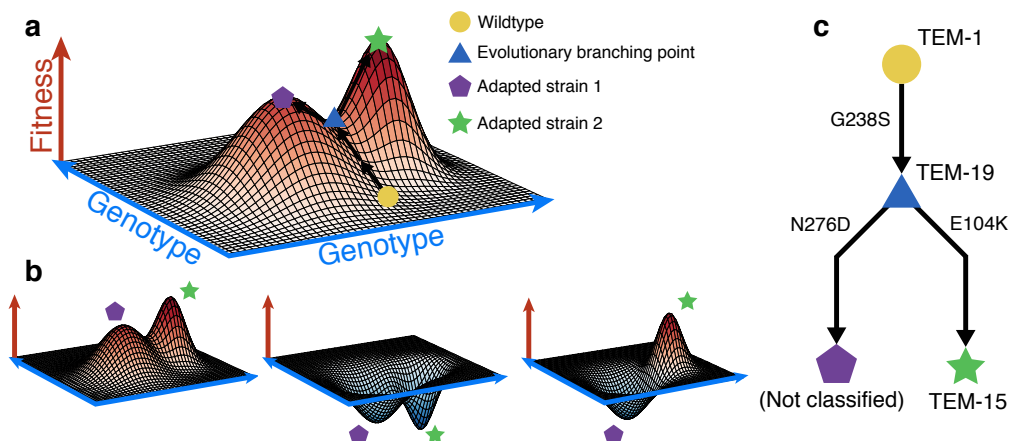

**Figure 1. Evolutionary saddle points can drive divergent collateral response.** **a** A schematic fitness landscape model in which divergent evolution can occur. Following Wright [26], the  $x - y$  plane represents the genotypes and the height of the landscape above this plane represents fitness. Two evolutionary trajectories, both starting from a wild-type genotype (yellow circle), are shown. These trajectories diverge at an evolutionary saddle point (blue triangle) and terminate at distinct local optima of fitness (purple pentagon, green star). As the saddle point exists, evolutionary trajectories need not be repeatable. **b** Schematic landscapes for a potential follow-up drug are shown, the collateral response can be (from left to right): always cross-resistant, always collaterally sensitive, or dependent on the evolutionary trajectory that occurs stochastically under the first drug. **c** A potential evolutionary branching point in the TEM gene of *E. coli* identified in the fitness landscape for cefotaxime derived by Mira et al. [29].

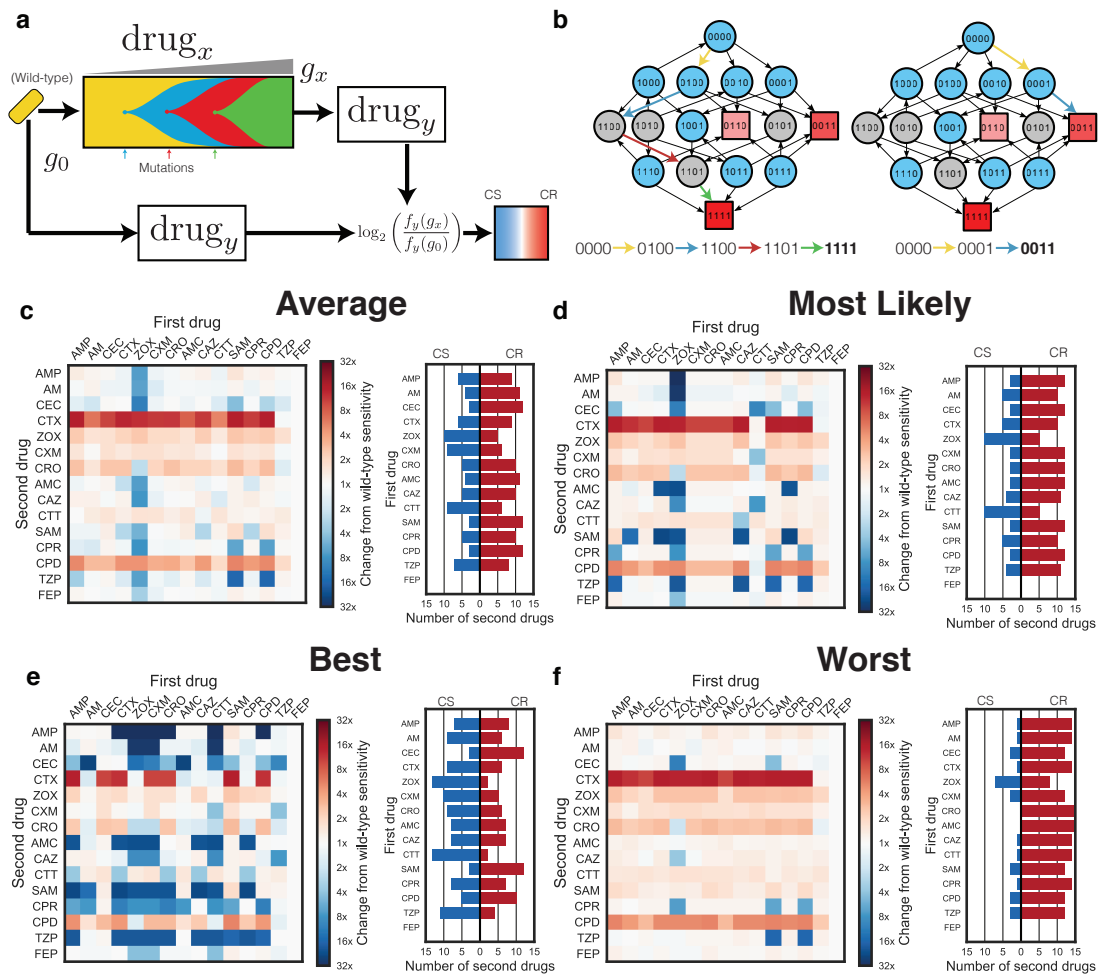

**Figure 2. Mathematical modeling predicts highly variable collateral response.** **a** A schematic of the model used to derive collateral response. Sequential mutations are simulated to fix in the population until a local optimum genotype arises. The fitness of this resultant genotype is compared to the fitness of the wild-type genotype for each of the panel of antibiotics. **b** The landscape for ampicillin derived by Mira et al. [29] represented as a graph of genotypes. Arrows indicate fitness conferring mutations between genotypes represented as nodes. Blue nodes indicate genotypes from which evolution can stochastically diverge, grey nodes indicate genotypes from which there is only a single fitness conferring mutation. Squares indicate local optima of fitness with colour indicating the ordering of fitness amongst these optima (darker red indicates higher fitness). Two divergent evolutionary trajectories, in the sense of the model shown schematically in **a**, are highlighted by coloured arrows. **c, d, e, f** The average, most likely, best case, and worst case tables of collateral response derived through stochastic simulation. Columns indicate the drug landscape under which the simulation was performed and rows indicate the follow-up drug under which the fold-change from wild-type susceptibility is calculated. Bar charts indicate, for each labelled first drug, the number of follow-up drugs exhibiting collateral sensitivity (blue) or cross resistance (red) in each case. CS - Collaterally sensitive, CR - Cross resistance.

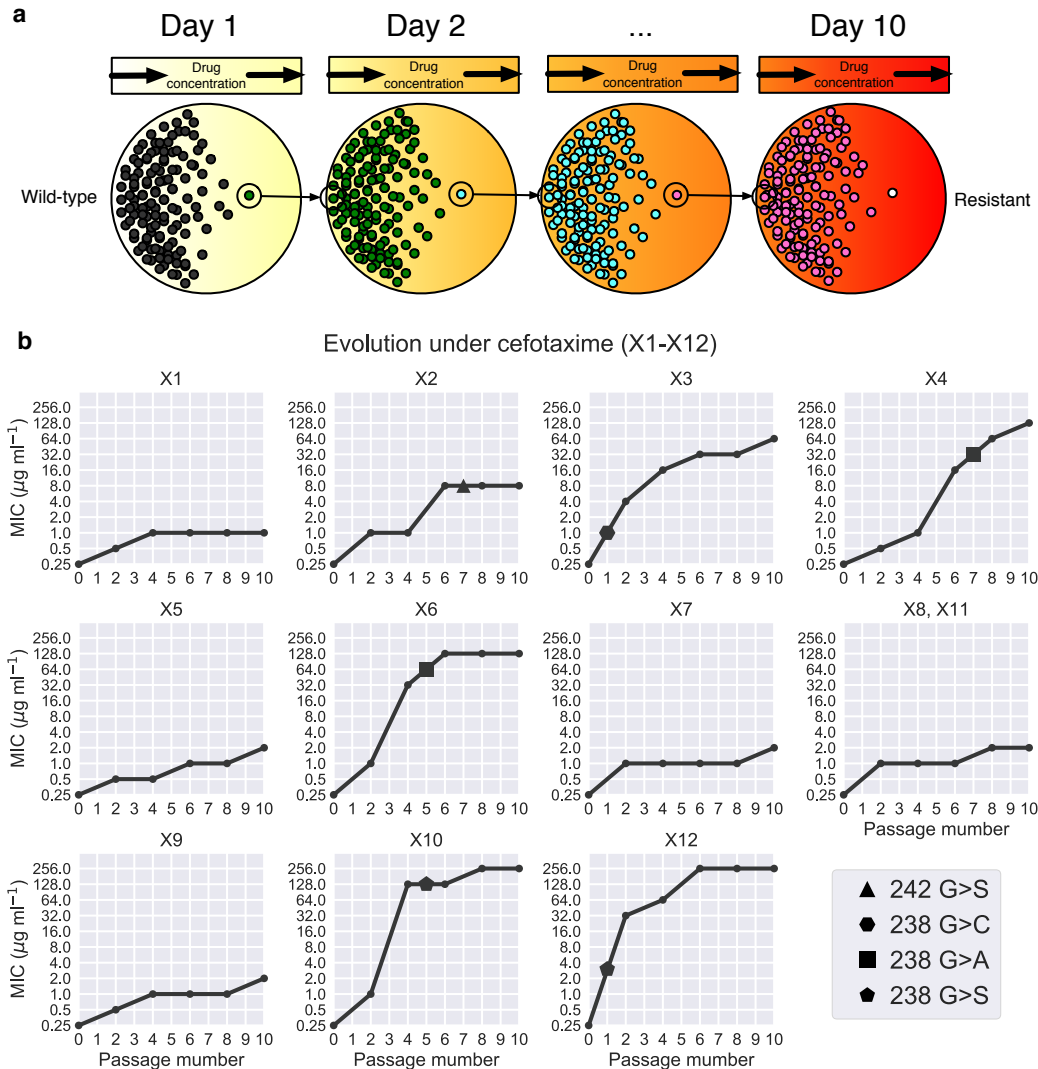

**Figure 3. Experimental evolution reveals divergent collateral response.** **a** A schematic of the evolutionary experiment. *E. coli* were grown using the gradient plate method and passaged every 24 hours for a total of 10 passages. Sixty replicates of experimental evolution were performed. **b** The MIC for 12 replicates (X1-X12) under cefotaxime exposure was measured following passages 0, 2, 4, 6, 8 and 10. These values are plotted, revealing heterogeneity in the degree of resistance evolved to cefotaxime. Targeted sequencing of the SHV gene was performed following each passage revealing four different SNVs between the replicates marked by geometric shapes (triangle - G242S, hexagon - G238C, square - G238A, pentagon - G238S). Mutations are marked at the earliest time point they were detected in each replicate.

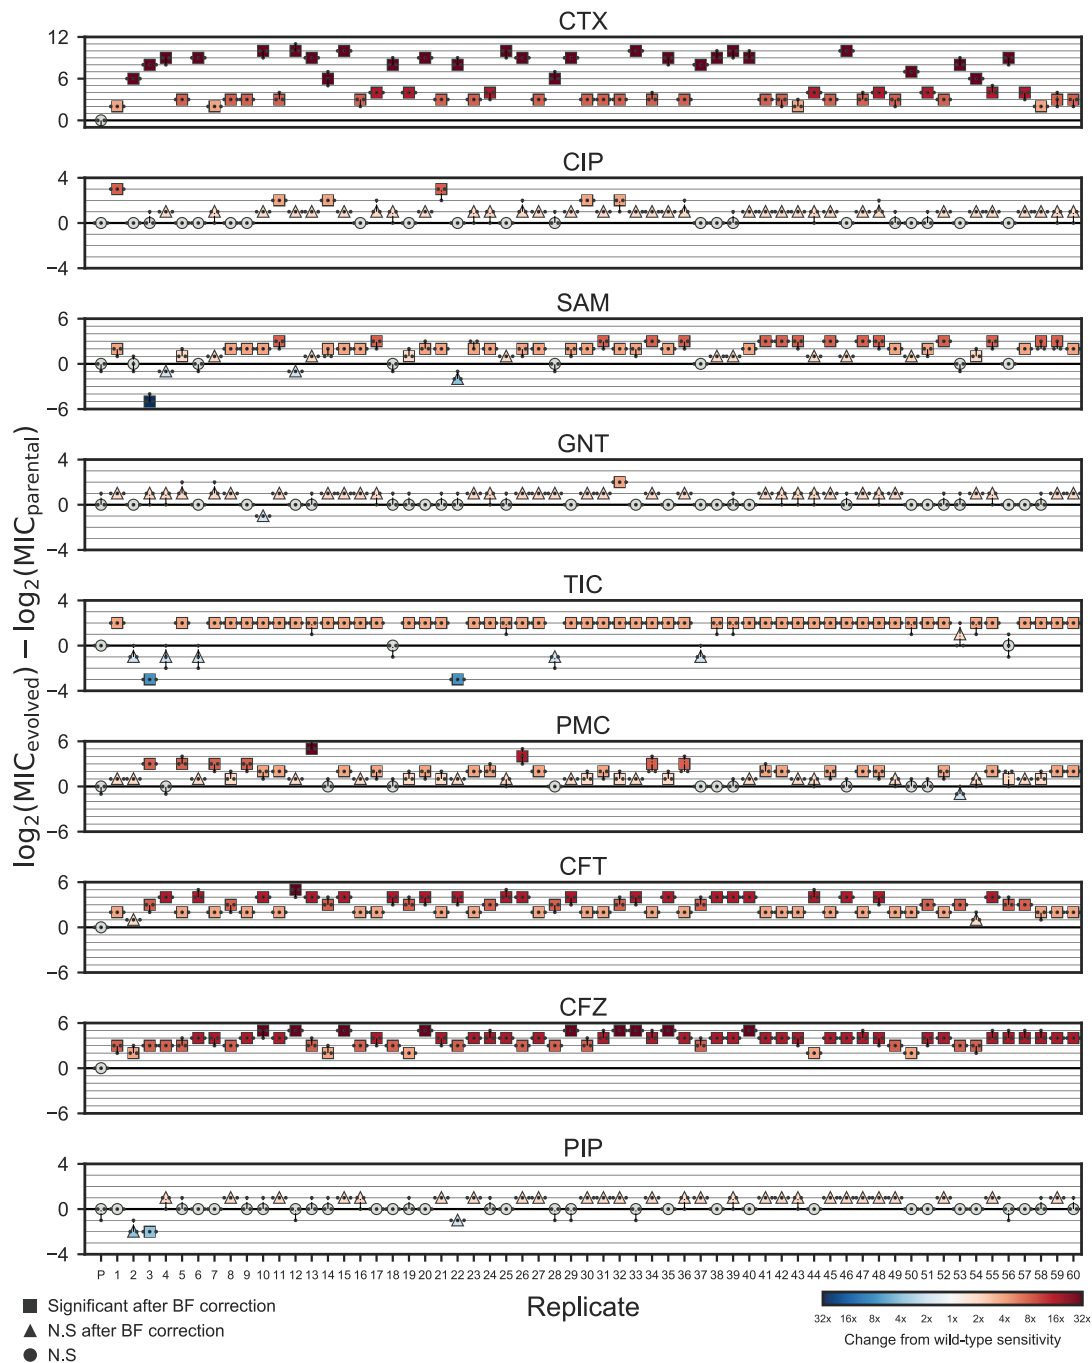

**Figure 4. Collateral response following evolution under cefotaxime.** The maximum likelihood estimates for the MICs of replicates X1-X60 under cefotaxime and eight other antibiotics. Small markers indicate individual measurements (taken in triplicate). Marker colour indicates fold change from wild-type sensitivity (increased sensitivity - blues, increased resistance - reds). Significance is determined via a likelihood ratio test (See Methods) and Bonferroni (BF) corrected. Precise p-values are reported in Supplementary Dataset 1.



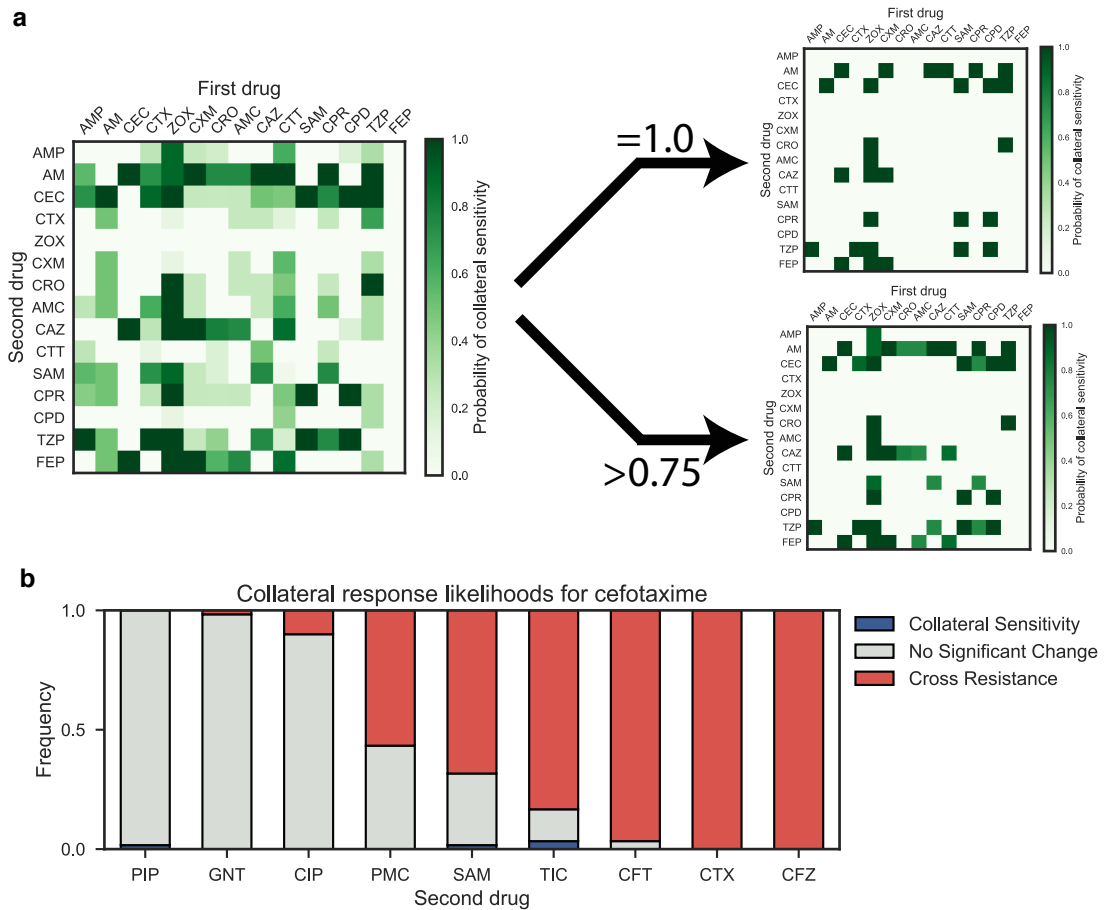

**Figure 5. Collateral sensitivity likelihoods.** **a** (Left) The table of collateral sensitivity likelihoods (CSLs) derived from the mathematical model. Each entry indicates the likelihood that the first drug (columns) induces increased sensitivity in the second (rows). (Right) The CSL table thresholded for drugs with  $P = 1.0$  (top) and  $P > 0.75$  (bottom) probability of inducing collateral sensitivity. **b** The estimated likelihoods for collateral sensitivity, cross resistance or no change in sensitivity derived from the sixty replicates of experimental evolution.

| Antibiotic              | Abbreviation | Antibiotic Group            | Notes                                  |
|-------------------------|--------------|-----------------------------|----------------------------------------|
| Cefotaxime              | CTX          | Cephalosporin               |                                        |
| Ciprofloxacin           | CIP          | Fluoroquinolone             |                                        |
| Ampicillin/sulbactam    | SAM          | $\beta$ -lactam combination | 2:1 ratio of ampicillin to sulbactam   |
| Gentamicin              | GNT          | Aminoglycoside              |                                        |
| Ticarcillin/clavulanate | TIC          | $\beta$ -lactam combination | 2 $\mu$ g ml <sup>-1</sup> clavulanate |
| Phosphomycin            | PMC          | Phosphomycin                |                                        |
| Ceftolozane/tazobactam  | CFT          | $\beta$ -lactam combination | 2:1 ratio of ceftolozane to tazobactam |
| Piperacillin            | PIP          | Penicillin                  |                                        |
| Cefazolin               | CFZ          | Cephalosporin               |                                        |

**Table 1. Antibiotic drugs used in this study.**

| Replicate | SHV-1 SNVs | Chromosomal SNVs                                           | Deletions (ranges)                 | IS1D Insertions                                                                        |
|-----------|------------|------------------------------------------------------------|------------------------------------|----------------------------------------------------------------------------------------|
| Parental  |            | 2099555 T>C<br>(intergenic yedK/yedL)                      |                                    |                                                                                        |
| X1p10     |            |                                                            | 4166399-4177327                    |                                                                                        |
| X2p10     | G242S      |                                                            |                                    |                                                                                        |
| X3p10     | G238C      |                                                            | 3079240-3088253                    | IS1D at 2849873 interrupts CP4-57 prophage predicted protein; 580 bp deletion adjacent |
| X4p10     | G238A      |                                                            | 3892703-3903946<br>2896300-2906979 |                                                                                        |
| X5p10     |            |                                                            |                                    | IS1D at 3506340 interrupts dusB                                                        |
| X6p10     | G238A      |                                                            |                                    |                                                                                        |
| X7p10     |            |                                                            |                                    |                                                                                        |
| X8p10     |            | 2401329 T>A<br>(ompC Q144V)                                |                                    |                                                                                        |
| X9p10     |            |                                                            |                                    | IS1D at 2401801<br>(upstream of ompC)                                                  |
| X10p10    | G238S      | 3630620 C>A<br>(envZ R339L);<br>771931 C>T<br>(speF L115L) | 4387943-4410705                    | IS1D at 4410705 interrupts rpiB;<br>14kb deletion adjacent                             |
| X11p10    |            | 3630620 C>A<br>(envZ R339L)                                | 2896300-2906979                    | IS1D at 2906979 interrupts gshA;<br>12kb deletion adjacent                             |
| X12p10    | G238S      |                                                            |                                    |                                                                                        |

**Table 2. Mutations identified through whole genome sequencing.** The single nucleotide variants (SNVs), insertions and deletions identified through whole genome sequencing of the replicates X1-X12 following passage 10 are listed.
